# Supplementary material for: Deciphering the Role of Metformin in Abdominal Aortic Aneurysm Progression: Insights from Two-Step Mendelian Randomization and Colocalization Analysis
Source: Research Square preprint supplement (doi:10.21203/rs.3.rs-6834737/v1), 2025-06-27
Supplement: Supplementary file 1 [file 033433cfe51137415d4acef4.docx]

**Supplementary File 9**. Results of MR analysis of the causal relationship between nine positive target genes of metformin treatment and AAA.

| **gene** | **method** | **nsnp** | **b** | **se** | **pval** | **lo_ci** | **up_ci** | **or** | **or_lci95** | **or_uci95** |
| --- | --- | --- | --- | --- | --- | --- | --- | --- | --- | --- |
| PRKAG3 | MR Egger | 3 | -0.007893891 | 0.443968036 | 0.988681894 | -0.878071241 | 0.862283459 | 0.992137184 | 0.4155837 | 2.36856304 |
| PRKAG3 | Weighted median | 3 | -0.220795275 | 0.113503737 | 0.051742639 | -0.4432626 | 0.00167205 | 0.801880828 | 0.641938612 | 1.001673448 |
| PRKAG3 | Inverse variance weighted | 3 | -0.23407411 | 0.108649191 | 0.031208606 | -0.447026525 | -0.021121695 | 0.79130317 | 0.639526944 | 0.979099806 |
| PRKAG3 | Simple mode | 3 | -0.260277649 | 0.172405117 | 0.270193335 | -0.598191677 | 0.07763638 | 0.770837534 | 0.549804962 | 1.080729613 |
| PRKAG3 | Weighted mode | 3 | -0.197778498 | 0.131593394 | 0.271720425 | -0.455701551 | 0.060144554 | 0.820551586 | 0.634003026 | 1.061990051 |
|  |  |  |  |  |  |  |  |  |  |  |
| NDUFAF1 | MR Egger | 10 | -0.00212765 | 0.11165768 | 0.985263815 | -0.220976703 | 0.216721403 | 0.997874612 | 0.801735358 | 1.241998037 |
| NDUFAF1 | Weighted median | 10 | -0.14912911 | 0.067634387 | 0.027458986 | -0.281692508 | -0.016565711 | 0.861457885 | 0.754505653 | 0.983570746 |
| NDUFAF1 | Inverse variance weighted | 10 | -0.133398588 | 0.053567585 | 0.012764046 | -0.238391055 | -0.028406122 | 0.875116211 | 0.78789452 | 0.971993539 |
| NDUFAF1 | Simple mode | 10 | -0.253878592 | 0.101224022 | 0.033415511 | -0.452277675 | -0.055479509 | 0.775785983 | 0.636177495 | 0.946031409 |
| NDUFAF1 | Weighted mode | 10 | -0.157333281 | 0.07894649 | 0.077432632 | -0.312068402 | -0.00259816 | 0.854419249 | 0.731931461 | 0.997405212 |
|  |  |  |  |  |  |  |  |  |  |  |
| NDUFAF3 | MR Egger | 3 | -0.797626636 | 0.461448595 | 0.333894924 | -1.702065882 | 0.106812609 | 0.450396652 | 0.182306511 | 1.112725721 |
| NDUFAF3 | Weighted median | 3 | -0.33250461 | 0.136888377 | 0.015139696 | -0.600805829 | -0.064203391 | 0.717125363 | 0.548369566 | 0.937814238 |
| NDUFAF3 | Inverse variance weighted | 3 | -0.302327525 | 0.120622245 | 0.012196775 | -0.538747124 | -0.065907925 | 0.739095953 | 0.583478821 | 0.936217062 |
| NDUFAF3 | Simple mode | 3 | -0.395572506 | 0.190023577 | 0.172825261 | -0.768018717 | -0.023126295 | 0.673294464 | 0.463931338 | 0.977139069 |
| NDUFAF3 | Weighted mode | 3 | -0.383207853 | 0.16292158 | 0.142982217 | -0.70253415 | -0.063881555 | 0.681671197 | 0.495328475 | 0.938116108 |
|  |  |  |  |  |  |  |  |  |  |  |
| NDUFB5 | MR Egger | 8 | 0.325704972 | 0.200296254 | 0.155049829 | -0.066875685 | 0.71828563 | 1.385006693 | 0.935311467 | 2.050914169 |
| NDUFB5 | Weighted median | 8 | 0.132129331 | 0.084605379 | 0.118355582 | -0.033697211 | 0.297955874 | 1.14125591 | 0.966864216 | 1.347102344 |
| NDUFB5 | Inverse variance weighted | 8 | 0.151413733 | 0.067978275 | 0.025921609 | 0.018176315 | 0.284651152 | 1.163477928 | 1.018342509 | 1.329298224 |
| NDUFB5 | Simple mode | 8 | 0.184715934 | 0.126666825 | 0.188122264 | -0.063551042 | 0.43298291 | 1.202876695 | 0.938426219 | 1.54184987 |
| NDUFB5 | Weighted mode | 8 | 0.144083616 | 0.097252843 | 0.182017225 | -0.046531956 | 0.334699188 | 1.15498068 | 0.954534057 | 1.397519932 |
|  |  |  |  |  |  |  |  |  |  |  |
| NDUFB9 | MR Egger | 11 | -0.142712678 | 0.121347519 | 0.269738948 | -0.380553816 | 0.09512846 | 0.867003143 | 0.683482781 | 1.099800127 |
| NDUFB9 | Weighted median | 11 | -0.159103069 | 0.069261195 | 0.021610449 | -0.294855011 | -0.023351127 | 0.852908446 | 0.744639544 | 0.976919401 |
| NDUFB9 | Inverse variance weighted | 11 | -0.161309587 | 0.052926866 | 0.002305366 | -0.265046245 | -0.05757293 | 0.851028563 | 0.767170471 | 0.944053038 |
| NDUFB9 | Simple mode | 11 | -0.125832458 | 0.097150773 | 0.224343553 | -0.316247973 | 0.064583056 | 0.881762566 | 0.728878686 | 1.066714171 |
| NDUFB9 | Weighted mode | 11 | -0.147700479 | 0.080087365 | 0.094936752 | -0.304671715 | 0.009270756 | 0.86268947 | 0.737365401 | 1.009313862 |
|  |  |  |  |  |  |  |  |  |  |  |
| NDUFB10 | MR Egger | 11 | -0.099933176 | 0.139389204 | 0.491598975 | -0.373136016 | 0.173269665 | 0.904897885 | 0.68857157 | 1.189186744 |
| NDUFB10 | Weighted median | 11 | -0.223039684 | 0.086428167 | 0.009861835 | -0.392438891 | -0.053640478 | 0.800083098 | 0.675407618 | 0.947772791 |
| NDUFB10 | Inverse variance weighted | 11 | -0.240692756 | 0.065382113 | 0.000232026 | -0.368841697 | -0.112543815 | 0.786083108 | 0.691534874 | 0.893558195 |
| NDUFB10 | Simple mode | 11 | -0.298520961 | 0.137946457 | 0.055728579 | -0.568896017 | -0.028145905 | 0.74191473 | 0.566150114 | 0.972246501 |
| NDUFB10 | Weighted mode | 11 | -0.235963316 | 0.108584838 | 0.054883805 | -0.448789598 | -0.023137034 | 0.789809647 | 0.638400406 | 0.977128575 |
|  |  |  |  |  |  |  |  |  |  |  |
| NDUFS5 | MR Egger | 43 | 0.016089621 | 0.035081954 | 0.648922209 | -0.05267101 | 0.084850252 | 1.016219756 | 0.948692072 | 1.088554046 |
| NDUFS5 | Weighted median | 43 | 0.038321413 | 0.023678632 | 0.105577196 | -0.008088706 | 0.084731532 | 1.039065148 | 0.99194392 | 1.08842482 |
| NDUFS5 | Inverse variance weighted | 43 | 0.038943143 | 0.016084752 | 0.015472693 | 0.007417029 | 0.070469257 | 1.039711367 | 1.007444604 | 1.073011582 |
| NDUFS5 | Simple mode | 43 | 0.050892783 | 0.039773352 | 0.20772004 | -0.027062987 | 0.128848553 | 1.052210073 | 0.973299935 | 1.137517838 |
| NDUFS5 | Weighted mode | 43 | 0.042122451 | 0.023954169 | 0.085954452 | -0.00482772 | 0.089072621 | 1.04302219 | 0.995183915 | 1.09316004 |
|  |  |  |  |  |  |  |  |  |  |  |
| NDUFV2 | MR Egger | 4 | -0.52156214 | 0.557500693 | 0.448272681 | -1.614263499 | 0.571139219 | 0.593592549 | 0.199037208 | 1.770282643 |
| NDUFV2 | Weighted median | 4 | -0.364743454 | 0.155166657 | 0.018740344 | -0.668870102 | -0.060616805 | 0.694374767 | 0.512287083 | 0.941183827 |
| NDUFV2 | Inverse variance weighted | 4 | -0.366299609 | 0.138875566 | 0.008349249 | -0.638495719 | -0.094103499 | 0.693295052 | 0.528086217 | 0.910188553 |
| NDUFV2 | Simple mode | 4 | -0.321962575 | 0.212145307 | 0.226389448 | -0.737767376 | 0.093842226 | 0.724725313 | 0.478180321 | 1.098386436 |
| NDUFV2 | Weighted mode | 4 | -0.36552893 | 0.189725072 | 0.149661095 | -0.737390071 | 0.006332211 | 0.693829567 | 0.478360775 | 1.006352302 |
|  |  |  |  |  |  |  |  |  |  |  |
| GPD2 | MR Egger | 42 | -0.069417233 | 0.064171345 | 0.285843072 | -0.195193069 | 0.056358604 | 0.932937347 | 0.82267581 | 1.05797701 |
| GPD2 | Weighted median | 42 | -0.0869919 | 0.033285396 | 0.008961602 | -0.152231277 | -0.021752523 | 0.916684521 | 0.85878964 | 0.978482357 |
| GPD2 | Inverse variance weighted | 42 | -0.070554581 | 0.022027073 | 0.00135964 | -0.113727644 | -0.027381519 | 0.931876875 | 0.892501001 | 0.972989957 |
| GPD2 | Simple mode | 42 | -0.064264534 | 0.056513526 | 0.262076677 | -0.175031045 | 0.046501977 | 0.937756898 | 0.83943096 | 1.04760015 |
| GPD2 | Weighted mode | 42 | -0.083438167 | 0.028858819 | 0.006111981 | -0.140001451 | -0.026874882 | 0.919947968 | 0.869356974 | 0.973483034 |
