# Supplementary material for: Deciphering the Role of Metformin in Abdominal Aortic Aneurysm Progression: Insights from Two-Step Mendelian Randomization and Colocalization Analysis
Source: Research Square preprint supplement (doi:10.21203/rs.3.rs-6834737/v1), 2025-06-27
Supplement: Supplementary file 2 [file 1f15c1afdc24a2c500d2978f.docx]

**Supplementary File 4. Table.** Selection of SNPs genetically associated with MCI target.

| **Gene** | **SNP** | **chr** | **pos** | **Effect allele** | **Other allele** | **se** | **beta** | **eaf** | **pval** |
| --- | --- | --- | --- | --- | --- | --- | --- | --- | --- |
| NDUFA2 | rs702401 | 5 | 139953923 | T | C | 0.036608 | -0.254927 | 0.027075 | 3.31E-12 |
| NDUFA2 | rs753280 | 5 | 140024042 | C | T | 0.0115093 | -0.393687 | 0.444749 | 1.00E-200 |
| NDUFA2 | rs7711117 | 5 | 139988753 | T | C | 0.0137791 | -0.228643 | 0.241159 | 7.78E-62 |
| NDUFA2 | rs34820433 | 5 | 139995865 | G | A | 0.0323954 | 0.234711 | 0.0348427 | 4.32E-13 |
| NDUFA2 | rs56276169 | 5 | 139996174 | G | A | 0.0237963 | 0.23329 | 0.0665636 | 1.09E-22 |
| NDUFA2 | rs12188417 | 5 | 140098596 | G | T | 0.0136629 | -0.245946 | 0.246034 | 1.91E-72 |
| NDUFA2 | rs4912715 | 5 | 139951790 | A | G | 0.0166529 | -0.181054 | 0.148822 | 1.56E-27 |
| NDUFA2 | rs143443534 | 5 | 139962344 | T | C | 0.0467371 | -0.388002 | 0.0164072 | 1.03E-16 |
| NDUFA2 | rs12659563 | 5 | 140007035 | T | C | 0.0396721 | 0.315108 | 0.0229328 | 1.98E-15 |
| NDUFA2 | rs148099171 | 5 | 140009337 | A | G | 0.04065 | -0.223672 | 0.0218696 | 3.75E-08 |
| NDUFA2 | rs5744442 | 5 | 140016791 | C | A | 0.0389068 | -0.249187 | 0.0239048 | 1.51E-10 |
| NDUFA2 | rs113627177 | 5 | 140054858 | T | G | 0.0360956 | -0.246941 | 0.0278754 | 7.84E-12 |
| NDUFA2 | rs801177 | 5 | 140095186 | C | A | 0.014181 | -0.286718 | 0.219265 | 6.72E-91 |
| NDUFA2 | rs77249906 | 5 | 140109524 | G | A | 0.01748 | 0.215697 | 0.132163 | 5.54E-35 |
| NDUFA2 | rs6873689 | 5 | 140119373 | T | C | 0.0424538 | 0.235279 | 0.020012 | 2.99E-08 |
| NDUFA2 | rs80049489 | 5 | 139948839 | G | A | 0.0244144 | 0.183318 | 0.0631849 | 5.98E-14 |
| NDUFA2 | rs78814797 | 5 | 139951373 | C | A | 0.0273586 | 0.19675 | 0.0496149 | 6.41E-13 |
| NDUFA2 | rs111314092 | 5 | 140057838 | T | C | 0.0417419 | -0.262469 | 0.0207021 | 3.22E-10 |
| NDUFA2 | rs77348867 | 5 | 139976090 | G | T | 0.0315133 | -0.206214 | 0.0369254 | 6.00E-11 |
| NDUFA2 | rs11954514 | 5 | 140056775 | C | A | 0.017878 | 0.195122 | 0.125702 | 9.88E-28 |
| NDUFA2 | rs2230361 | 5 | 140057535 | A | G | 0.023904 | 0.222487 | 0.0659672 | 1.31E-20 |
| NDUFA3 | rs11669427 | 19 | 54561792 | A | G | 0.0142951 | 0.118328 | 0.221627 | 1.26E-16 |
| NDUFA3 | rs662850 | 19 | 54566901 | T | C | 0.0122585 | -0.0764649 | 0.377858 | 4.44E-10 |
| NDUFA3 | rs191155753 | 19 | 54596882 | T | C | 0.0246844 | -0.160108 | 0.0617797 | 8.79E-11 |
| NDUFA3 | rs75348432 | 19 | 54639661 | G | C | 0.041611 | 0.405079 | 0.0207527 | 2.14E-22 |
| NDUFA3 | rs6509846 | 19 | 54670639 | T | C | 0.0140854 | -0.0859916 | 0.768188 | 1.03E-09 |
| NDUFA3 | rs75622830 | 19 | 54611734 | G | A | 0.0214142 | 0.676235 | 0.0782777 | 1.00E-200 |
| NDUFA3 | rs10853869 | 19 | 54631097 | A | G | 0.013646 | 0.282725 | 0.244297 | 2.36E-95 |
| NDUFA3 | rs4806718 | 19 | 54657877 | C | T | 0.0123408 | -0.100773 | 0.363999 | 3.19E-16 |
| NDUFA3 | rs254277 | 19 | 54624544 | A | G | 0.0352906 | -0.197352 | 0.970765 | 2.24E-08 |
| NDUFA3 | rs254259 | 19 | 54606405 | C | T | 0.0118868 | -0.21901 | 0.572002 | 8.34E-76 |
| NDUFA3 | rs2576453 | 19 | 54632253 | A | G | 0.012173 | -0.182858 | 0.621278 | 5.32E-51 |
| NDUFA3 | rs12975015 | 19 | 54574794 | A | G | 0.0161527 | -0.106923 | 0.161397 | 3.60E-11 |
| NDUFA3 | rs254276 | 19 | 54626054 | C | T | 0.0167125 | -0.14336 | 0.148101 | 9.64E-18 |
| NDUFA3 | rs4806711 | 19 | 54619191 | G | A | 0.0145339 | -0.106871 | 0.212 | 1.94E-13 |
| NDUFA3 | rs171703 | 19 | 54631378 | C | T | 0.0172084 | -0.145979 | 0.86192 | 2.19E-17 |
| NDUFA3 | rs45513391 | 19 | 54631381 | A | G | 0.0126098 | 0.0870367 | 0.332752 | 5.12E-12 |
| NDUFA3 | rs113501156 | 19 | 54576554 | C | T | 0.0148706 | -0.106216 | 0.199354 | 9.15E-13 |
| NDUFA3 | rs55826339 | 19 | 54576758 | A | G | 0.0118882 | 0.104969 | 0.527097 | 1.05E-18 |
| NDUFA3 | rs663569 | 19 | 54601496 | A | G | 0.0354426 | -0.204982 | 0.971028 | 7.32E-09 |
| NDUFA3 | rs254260 | 19 | 54606209 | G | T | 0.0372638 | -0.205722 | 0.973862 | 3.38E-08 |
| NDUFA3 | rs35292594 | 19 | 54639948 | G | T | 0.021869 | -0.136766 | 0.0803138 | 4.00E-10 |
| NDUFA3 | rs35089861 | 19 | 54662043 | T | C | 0.0261612 | -0.169355 | 0.0545836 | 9.57E-11 |
| NDUFA3 | rs891055 | 19 | 54668545 | G | C | 0.01268 | -0.102069 | 0.324818 | 8.29E-16 |
| NDUFA4 | rs10278471 | 7 | 10907315 | A | G | 0.0121806 | 0.0703067 | 0.60867 | 7.82E-09 |
| NDUFA4 | rs7357204 | 7 | 10928266 | G | T | 0.0119588 | 0.0737859 | 0.44547 | 6.84E-10 |
| NDUFA4 | rs218970 | 7 | 10986944 | G | A | 0.0139764 | 0.0845821 | 0.237081 | 1.43E-09 |
| NDUFA4 | rs6953367 | 7 | 10957253 | C | T | 0.0119494 | -0.0807565 | 0.552131 | 1.40E-11 |
| NDUFA4L2 | rs3923885 | 12 | 57634698 | G | T | 0.0118916 | 0.0655191 | 0.493959 | 3.60E-08 |
| NDUFA5 | rs4483092 | 7 | 123091122 | G | A | 0.0133314 | -0.0794806 | 0.273754 | 2.49E-09 |
| NDUFA5 | rs7779567 | 7 | 123208295 | A | G | 0.0132658 | -0.0757453 | 0.278246 | 1.13E-08 |
| NDUFA5 | rs73222282 | 7 | 123196718 | C | T | 0.0129914 | 0.0746161 | 0.298489 | 9.28E-09 |
| NDUFA6 | rs76277210 | 22 | 42447531 | A | G | 0.0375285 | -0.372001 | 0.025635 | 3.67E-23 |
| NDUFA6 | rs117644134 | 22 | 42384019 | T | C | 0.0466201 | -0.334387 | 0.0165118 | 7.35E-13 |
| NDUFA6 | rs55758879 | 22 | 42392091 | A | G | 0.0289415 | 1.27827 | 0.0386495 | 1.00E-200 |
| NDUFA6 | rs9620006 | 22 | 42399547 | A | T | 0.013091 | -0.29879 | 0.27493 | 2.64E-115 |
| NDUFA6 | rs62238599 | 22 | 42504168 | G | A | 0.0413745 | -0.260432 | 0.0210794 | 3.08E-10 |
| NDUFA6 | rs5758563 | 22 | 42448761 | T | G | 0.0384128 | -0.226843 | 0.0245505 | 3.51E-09 |
| NDUFA6 | rs5751221 | 22 | 42516366 | T | C | 0.0143622 | -0.401612 | 0.204563 | 4.53E-172 |
| NDUFA6 | rs117795733 | 22 | 42438985 | T | C | 0.045471 | -0.452833 | 0.0173126 | 2.31E-23 |
| NDUFA6 | rs55750514 | 22 | 42548433 | C | G | 0.0240581 | -0.373372 | 0.0643112 | 2.56E-54 |
| NDUFA6 | rs5758573 | 22 | 42468250 | T | G | 0.0138394 | -0.0887767 | 0.756098 | 1.41E-10 |
| NDUFA6 | rs5751233 | 22 | 42566101 | T | G | 0.0361131 | -0.331215 | 0.0277722 | 4.66E-20 |
| NDUFA6 | rs2267448 | 22 | 42538618 | G | A | 0.0117874 | 0.23408 | 0.455505 | 9.29E-88 |
| NDUFA6 | rs29001678 | 22 | 42526524 | A | G | 0.0367707 | 1.27293 | 0.0247619 | 1.00E-200 |
| NDUFA7 | rs2967620 | 19 | 8309242 | C | T | 0.0167185 | -0.128386 | 0.851842 | 1.60E-14 |
| NDUFA7 | rs36250 | 19 | 8322594 | A | G | 0.0119177 | 0.0727752 | 0.464627 | 1.02E-09 |
| NDUFA7 | rs250508 | 19 | 8334280 | T | C | 0.0118029 | 0.187464 | 0.486396 | 8.34E-57 |
| NDUFA7 | rs35814151 | 19 | 8343666 | A | G | 0.0118538 | -0.1291 | 0.499852 | 1.27E-27 |
| NDUFA7 | rs4350678 | 19 | 8447366 | G | A | 0.0118962 | 0.0749304 | 0.519829 | 3.00E-10 |
| NDUFA7 | rs2927726 | 19 | 8293449 | T | C | 0.0119159 | -0.0905943 | 0.460778 | 2.90E-14 |
| NDUFA7 | rs2967619 | 19 | 8312012 | T | G | 0.0119019 | -0.0766388 | 0.4742 | 1.20E-10 |
| NDUFA7 | rs74349734 | 19 | 8408770 | T | A | 0.0202297 | 0.205141 | 0.094948 | 3.65E-24 |
| NDUFA7 | rs111287830 | 19 | 8414149 | A | G | 0.0249054 | 0.204222 | 0.0604981 | 2.41E-16 |
| NDUFA7 | rs73497430 | 19 | 8420054 | G | T | 0.013951 | 0.0905087 | 0.2382 | 8.73E-11 |
| NDUFA7 | rs111500536 | 19 | 8425558 | A | G | 0.0256578 | 0.140628 | 0.0569359 | 4.23E-08 |
| NDUFA7 | rs144110893 | 19 | 8425649 | A | G | 0.0316968 | -0.183838 | 0.036507 | 6.63E-09 |
| NDUFA7 | rs78820482 | 19 | 8472294 | T | C | 0.0190093 | 0.127168 | 0.109769 | 2.23E-11 |
| NDUFA7 | rs11667277 | 19 | 8476358 | A | G | 0.0424283 | 0.244447 | 0.020033 | 8.35E-09 |
| NDUFA7 | rs12977617 | 19 | 8484862 | T | G | 0.0484486 | -0.521607 | 0.0151994 | 4.96E-27 |
| NDUFA7 | rs144725143 | 19 | 8307305 | G | A | 0.0431181 | -0.312637 | 0.0193573 | 4.14E-13 |
| NDUFA7 | rs62126446 | 19 | 8308983 | G | T | 0.0286027 | 0.200731 | 0.0451905 | 2.25E-12 |
| NDUFA7 | rs138174609 | 19 | 8336530 | T | C | 0.0275945 | 0.284845 | 0.0485266 | 5.58E-25 |
| NDUFA7 | rs113563569 | 19 | 8289148 | A | G | 0.0191448 | 0.195384 | 0.107494 | 1.87E-24 |
| NDUFA7 | rs61229509 | 19 | 8335472 | G | T | 0.0273722 | 0.159864 | 0.0496283 | 5.21E-09 |
| NDUFA7 | rs2913939 | 19 | 8336528 | A | G | 0.0163027 | 0.144864 | 0.157276 | 6.35E-19 |
| NDUFA7 | rs2232775 | 19 | 8373152 | C | T | 0.0283261 | 0.229974 | 0.0460653 | 4.71E-16 |
| NDUFA7 | rs561 | 19 | 8376431 | A | G | 0.0155114 | -0.438212 | 0.167355 | 1.38E-175 |
| NDUFA7 | rs34419369 | 19 | 8409257 | C | T | 0.0132053 | 0.227457 | 0.274069 | 1.74E-66 |
| NDUFA7 | rs117760119 | 19 | 8432737 | T | C | 0.0234792 | -0.196584 | 0.068653 | 5.63E-17 |
| NDUFA7 | rs150057594 | 19 | 8465523 | C | T | 0.0304803 | 0.241758 | 0.0395212 | 2.17E-15 |
| NDUFA7 | rs111712708 | 19 | 8328149 | A | G | 0.012249 | -0.138635 | 0.373398 | 1.07E-29 |
| NDUFA7 | rs250507 | 19 | 8333061 | C | T | 0.0162351 | 0.12502 | 0.159164 | 1.36E-14 |
| NDUFA7 | rs76624499 | 19 | 8339547 | A | C | 0.0124923 | -0.101705 | 0.655152 | 3.91E-16 |
| NDUFA7 | rs187817838 | 19 | 8366469 | A | C | 0.0464286 | -0.516555 | 0.0165646 | 9.40E-29 |
| NDUFA7 | rs2232765 | 19 | 8374065 | C | G | 0.0121105 | 0.0747972 | 0.404469 | 6.57E-10 |
| NDUFA7 | rs2241590 | 19 | 8386701 | A | G | 0.0121678 | 0.221286 | 0.372643 | 6.64E-74 |
| NDUFA7 | rs12610494 | 19 | 8407470 | C | G | 0.0182982 | -0.216104 | 0.118898 | 3.46E-32 |
| NDUFA8 | rs10818633 | 9 | 124890321 | A | G | 0.0122678 | -0.0899855 | 0.624583 | 2.22E-13 |
| NDUFA8 | rs61249479 | 9 | 124912908 | A | C | 0.0189816 | 0.112779 | 0.110219 | 2.83E-09 |
| NDUFA8 | rs12156510 | 9 | 124919973 | G | A | 0.0132655 | 0.162528 | 0.274572 | 1.64E-34 |
| NDUFA8 | rs145096012 | 9 | 124957432 | C | A | 0.0400194 | 0.305596 | 0.022535 | 2.24E-14 |
| NDUFA8 | rs2274748 | 9 | 124976152 | C | G | 0.0125024 | -0.0767937 | 0.345134 | 8.13E-10 |
| NDUFA8 | rs77945901 | 9 | 124908349 | T | C | 0.0242478 | 0.470579 | 0.0626014 | 6.73E-84 |
| NDUFA8 | rs117821317 | 9 | 124867491 | A | G | 0.0346179 | 0.278276 | 0.030345 | 9.10E-16 |
| NDUFA8 | rs1888214 | 9 | 124953019 | G | A | 0.0118885 | -0.0759553 | 0.490529 | 1.67E-10 |
| NDUFA8 | rs10985549 | 9 | 124911894 | C | T | 0.0120688 | -0.13128 | 0.593936 | 1.47E-27 |
| NDUFA9 | rs16931572 | 12 | 4711237 | G | T | 0.0126819 | -0.0942148 | 0.325059 | 1.09E-13 |
| NDUFA9 | rs78705685 | 12 | 4779128 | T | C | 0.0183918 | -0.115475 | 0.118465 | 3.41E-10 |
| NDUFA9 | rs7312558 | 12 | 4778463 | G | C | 0.0124736 | 0.108846 | 0.346531 | 2.64E-18 |
| NDUFA9 | rs34475613 | 12 | 4882741 | C | G | 0.0162361 | 0.0999268 | 0.159438 | 7.54E-10 |
| NDUFA9 | rs2270134 | 12 | 4758788 | G | A | 0.0118642 | -0.155328 | 0.536905 | 3.66E-39 |
| NDUFA10 | rs77216981 | 2 | 240897186 | T | C | 0.0344794 | -0.509464 | 0.0302586 | 2.09E-49 |
| NDUFA10 | rs13019067 | 2 | 240875852 | A | G | 0.012113 | 0.378585 | 0.344432 | 1.00E-200 |
| NDUFA10 | rs79451541 | 2 | 240929777 | A | G | 0.0349798 | 0.333308 | 0.0296442 | 1.59E-21 |
| NDUFA10 | rs78746126 | 2 | 240948164 | A | G | 0.0372565 | 0.527724 | 0.0258297 | 1.52E-45 |
| NDUFA10 | rs28412675 | 2 | 240850839 | G | A | 0.0168494 | -0.571356 | 0.133085 | 1.00E-200 |
| NDUFA10 | rs145457219 | 2 | 240872153 | C | T | 0.0306056 | 0.234369 | 0.0391969 | 1.89E-14 |
| NDUFA10 | rs4854070 | 2 | 240894871 | C | G | 0.012836 | -0.301981 | 0.707645 | 2.21E-122 |
| NDUFA10 | rs78936532 | 2 | 240904021 | C | A | 0.0402709 | 0.379988 | 0.0221986 | 3.89E-21 |
| NDUFA10 | rs137872144 | 2 | 240924479 | T | C | 0.0498338 | -0.62984 | 0.0143091 | 1.29E-36 |
| NDUFA10 | rs116550810 | 2 | 240868237 | A | G | 0.033508 | -0.20974 | 0.0325197 | 3.86E-10 |
| NDUFA10 | rs11695670 | 2 | 240862616 | G | A | 0.0463806 | -0.490678 | 0.0166136 | 3.71E-26 |
| NDUFA10 | rs12986883 | 2 | 240850538 | G | A | 0.0126432 | 0.187155 | 0.321718 | 1.41E-49 |
| NDUFA10 | rs62181321 | 2 | 240873510 | A | G | 0.011886 | 0.185915 | 0.440527 | 3.80E-55 |
| NDUFA10 | rs144988364 | 2 | 240959775 | A | G | 0.0403918 | 0.226198 | 0.0221549 | 2.14E-08 |
| NDUFA10 | rs73009334 | 2 | 240929789 | T | C | 0.0249555 | 0.246428 | 0.0601016 | 5.36E-23 |
| NDUFA10 | rs142540958 | 2 | 240932476 | G | A | 0.0454368 | -0.874771 | 0.0170086 | 1.34E-82 |
| NDUFA10 | rs115495226 | 2 | 240949917 | G | T | 0.0484369 | 0.375589 | 0.0152677 | 8.89E-15 |
| NDUFA10 | rs11693245 | 2 | 240954079 | A | G | 0.0152609 | -0.831772 | 0.147373 | 1.00E-200 |
| NDUFA10 | rs74551156 | 2 | 240970061 | G | C | 0.0244123 | -0.264563 | 0.0629058 | 2.29E-27 |
| NDUFA10 | rs138289134 | 2 | 240820236 | T | C | 0.0120726 | -0.0679399 | 0.413399 | 1.83E-08 |
| NDUFA10 | rs12695008 | 2 | 240859255 | C | T | 0.0130443 | -0.294343 | 0.721504 | 9.62E-113 |
| NDUFA10 | rs116559045 | 2 | 240871886 | A | G | 0.0384119 | 0.316199 | 0.0244934 | 1.84E-16 |
| NDUFA10 | rs4149542 | 2 | 240955880 | G | A | 0.0172892 | -0.486623 | 0.128796 | 2.67E-174 |
| NDUFA10 | rs138867990 | 2 | 240822838 | A | T | 0.0183432 | 0.105264 | 0.119255 | 9.56E-09 |
| NDUFA10 | rs4996007 | 2 | 240874059 | C | T | 0.0121777 | -0.451809 | 0.320117 | 1.00E-200 |
| NDUFA10 | rs4854071 | 2 | 240885050 | T | C | 0.0117808 | 0.516559 | 0.340745 | 1.00E-200 |
| NDUFA10 | rs75293257 | 2 | 240906151 | A | G | 0.0311111 | 0.408333 | 0.0375682 | 2.37E-39 |
| NDUFA10 | rs73007454 | 2 | 240916293 | A | G | 0.048631 | -0.377396 | 0.015144 | 8.47E-15 |
| NDUFA10 | rs142141504 | 2 | 241061813 | A | G | 0.0502845 | -0.30759 | 0.0141733 | 9.52E-10 |
| NDUFA11 | rs2637201 | 19 | 5889934 | A | G | 0.0118456 | 0.163658 | 0.469717 | 2.04E-43 |
| NDUFA11 | rs35549731 | 19 | 5976760 | C | T | 0.0260504 | -0.168254 | 0.0550787 | 1.06E-10 |
| NDUFA11 | rs452767 | 19 | 5995450 | C | T | 0.0118586 | -0.130307 | 0.484558 | 4.35E-28 |
| NDUFA11 | rs3795017 | 19 | 6003526 | G | A | 0.0121811 | -0.0976936 | 0.388879 | 1.06E-15 |
| NDUFA11 | rs113752432 | 19 | 5885099 | A | G | 0.0181904 | -0.106465 | 0.121576 | 4.83E-09 |
| NDUFA11 | rs183513724 | 19 | 5888127 | A | G | 0.0464642 | -0.25749 | 0.0166495 | 2.99E-08 |
| NDUFA11 | rs72989070 | 19 | 5895358 | T | C | 0.0161697 | -0.190993 | 0.159644 | 3.39E-32 |
| NDUFA11 | rs12984568 | 19 | 5999483 | A | G | 0.0155643 | -0.127044 | 0.176799 | 3.28E-16 |
| NDUFA11 | rs778974 | 19 | 5870736 | A | G | 0.0120802 | 0.114768 | 0.593829 | 2.09E-21 |
| NDUFA11 | rs72989022 | 19 | 5864438 | T | C | 0.0233466 | -0.172443 | 0.0695802 | 1.51E-13 |
| NDUFA11 | rs11666136 | 19 | 5908200 | A | C | 0.0228978 | 0.136352 | 0.072674 | 2.60E-09 |
| NDUFA12 | rs10859786 | 12 | 95295510 | G | A | 0.0144567 | 0.286806 | 0.791728 | 1.37E-87 |
| NDUFA12 | rs10859794 | 12 | 95317163 | T | C | 0.0115282 | 0.377728 | 0.452046 | 1.00E-200 |
| NDUFA12 | rs7133607 | 12 | 95351254 | C | A | 0.0143966 | 0.608665 | 0.186473 | 1.00E-200 |
| NDUFA12 | rs11107823 | 12 | 95359346 | A | G | 0.0189493 | 0.134555 | 0.110513 | 1.24E-12 |
| NDUFA12 | rs10777662 | 12 | 95362887 | A | T | 0.0101603 | 0.841906 | 0.36161 | 1.00E-200 |
| NDUFA12 | rs77633554 | 12 | 95370238 | T | C | 0.0267681 | 0.379034 | 0.0513852 | 1.62E-45 |
| NDUFA12 | rs59732187 | 12 | 95387784 | T | C | 0.0217065 | -0.32059 | 0.0805203 | 2.31E-49 |
| NDUFA12 | rs17321986 | 12 | 95397275 | T | G | 0.0220029 | -0.331623 | 0.078112 | 2.48E-51 |
| NDUFA12 | rs56029035 | 12 | 95397807 | A | C | 0.0469141 | -0.506555 | 0.0162261 | 3.53E-27 |
| NDUFA12 | rs2043366 | 12 | 95469513 | C | A | 0.0125752 | -0.813936 | 0.777962 | 1.00E-200 |
| NDUFA12 | rs7961204 | 12 | 95277380 | T | C | 0.0128133 | -0.136448 | 0.689635 | 1.77E-26 |
| NDUFA12 | rs117044493 | 12 | 95284718 | A | G | 0.0485887 | -0.328348 | 0.0151866 | 1.40E-11 |
| NDUFA12 | rs34120337 | 12 | 95295635 | A | G | 0.0147088 | 0.352585 | 0.195579 | 5.58E-127 |
| NDUFA12 | rs10859787 | 12 | 95295988 | C | G | 0.0134165 | 0.295076 | 0.255607 | 3.33E-107 |
| NDUFA12 | rs7484322 | 12 | 95296136 | C | T | 0.0121963 | 0.303152 | 0.352197 | 2.23E-136 |
| NDUFA12 | rs78297294 | 12 | 95312097 | G | T | 0.0417809 | 0.607607 | 0.0204094 | 6.51E-48 |
| NDUFA12 | rs12817605 | 12 | 95315513 | G | C | 0.0119721 | 0.0780783 | 0.559989 | 6.95E-11 |
| NDUFA12 | rs1863554 | 12 | 95316560 | C | T | 0.0118582 | 0.153538 | 0.467718 | 2.42E-38 |
| NDUFA12 | rs12302104 | 12 | 95329075 | A | G | 0.0467561 | -0.55168 | 0.0163114 | 3.94E-32 |
| NDUFA12 | rs11611738 | 12 | 95332099 | A | G | 0.012136 | 0.173607 | 0.613679 | 2.03E-46 |
| NDUFA12 | rs12322505 | 12 | 95336101 | C | T | 0.0162974 | -0.50274 | 0.146368 | 1.00E-200 |
| NDUFA12 | rs77002297 | 12 | 95346087 | A | G | 0.0445092 | 0.701442 | 0.0178919 | 5.92E-56 |
| NDUFA12 | rs12814712 | 12 | 95360709 | A | G | 0.0199849 | -0.41189 | 0.0951558 | 2.22E-94 |
| NDUFA12 | rs61688935 | 12 | 95387556 | T | C | 0.011609 | -0.48078 | 0.374962 | 1.00E-200 |
| NDUFA12 | rs147654736 | 12 | 95390443 | C | A | 0.0244351 | -0.230515 | 0.062915 | 3.95E-21 |
| NDUFA12 | rs75200697 | 12 | 95418777 | G | A | 0.0462328 | -0.337675 | 0.0167921 | 2.79E-13 |
| NDUFA12 | rs77352263 | 12 | 95437379 | T | C | 0.0141789 | -0.451318 | 0.207424 | 1.00E-200 |
| NDUFA12 | rs117821582 | 12 | 95438472 | C | T | 0.0460946 | -0.495766 | 0.0168194 | 5.59E-27 |
| NDUFA12 | rs149929727 | 12 | 95448705 | A | T | 0.0450391 | 0.635002 | 0.0175273 | 3.86E-45 |
| NDUFA12 | rs7135351 | 12 | 95455364 | C | T | 0.0191811 | 0.707003 | 0.0972935 | 1.00E-200 |
| NDUFA12 | rs117207609 | 12 | 95475771 | G | A | 0.0243269 | 0.813551 | 0.0589362 | 1.00E-200 |
| NDUFA12 | rs138015148 | 12 | 95481302 | A | G | 0.0320757 | -0.337212 | 0.0354168 | 7.51E-26 |
| NDUFA12 | rs11608510 | 12 | 95293538 | G | A | 0.0127014 | -0.181223 | 0.316848 | 3.45E-46 |
| NDUFA12 | rs73366777 | 12 | 95301549 | A | G | 0.0146757 | -0.247054 | 0.202065 | 1.37E-63 |
| NDUFA12 | rs12227661 | 12 | 95322953 | A | C | 0.0156749 | 0.186851 | 0.172486 | 9.29E-33 |
| NDUFA12 | rs146775906 | 12 | 95323244 | T | C | 0.0464269 | 0.601107 | 0.0165141 | 2.43E-38 |
| NDUFA12 | rs73368744 | 12 | 95323865 | C | A | 0.0386789 | 0.412867 | 0.0240674 | 1.34E-26 |
| NDUFA12 | rs12370040 | 12 | 95333937 | T | C | 0.0250978 | -0.280809 | 0.059253 | 4.63E-29 |
| NDUFA12 | rs1654940 | 12 | 95334537 | A | G | 0.0159735 | -0.191078 | 0.835502 | 5.61E-33 |
| NDUFA12 | rs146653996 | 12 | 95342412 | A | G | 0.0451239 | 0.628486 | 0.0174662 | 4.29E-44 |
| NDUFA12 | rs75898016 | 12 | 95343120 | G | A | 0.0398073 | 0.743803 | 0.0223127 | 6.56E-78 |
| NDUFA12 | rs1961384 | 12 | 95354981 | A | G | 0.0173207 | -0.335101 | 0.132611 | 2.16E-83 |
| NDUFA12 | rs143654691 | 12 | 95358205 | T | C | 0.0304253 | -0.313192 | 0.0395453 | 7.51E-25 |
| NDUFA12 | rs149722652 | 12 | 95368113 | T | C | 0.0533559 | 0.347432 | 0.0125636 | 7.45E-11 |
| NDUFA12 | rs12367625 | 12 | 95396127 | G | A | 0.0127429 | -0.395566 | 0.286012 | 1.00E-200 |
| NDUFA12 | rs117928478 | 12 | 95477977 | T | C | 0.0492532 | 0.641755 | 0.0146431 | 8.30E-39 |
| NDUFA12 | rs144000553 | 12 | 95479175 | T | C | 0.0426215 | 0.915279 | 0.0192537 | 2.70E-102 |
| NDUFA12 | rs7977311 | 12 | 95487226 | T | C | 0.0189306 | -0.337511 | 0.108425 | 4.22E-71 |
| NDUFA12 | rs76812851 | 12 | 95296447 | T | C | 0.0237499 | 0.364395 | 0.0661457 | 3.95E-53 |
| NDUFA12 | rs80072514 | 12 | 95316856 | A | G | 0.025868 | -0.150526 | 0.0559401 | 5.92E-09 |
| NDUFA12 | rs73218097 | 12 | 95329523 | C | T | 0.0117384 | -0.360783 | 0.40489 | 1.00E-200 |
| NDUFA12 | rs80033262 | 12 | 95329619 | A | C | 0.0329632 | 0.368159 | 0.0334332 | 5.80E-29 |
| NDUFA12 | rs1648429 | 12 | 95335301 | A | C | 0.0121768 | 0.102841 | 0.389098 | 3.03E-17 |
| NDUFA12 | rs2555047 | 12 | 95349698 | T | C | 0.0117644 | -0.230524 | 0.471194 | 1.70E-85 |
| NDUFA12 | rs7398067 | 12 | 95387047 | C | T | 0.0163784 | 0.569799 | 0.141703 | 1.00E-200 |
| NDUFA12 | rs11107852 | 12 | 95389054 | T | C | 0.0326829 | 0.815819 | 0.0328388 | 1.60E-137 |
| NDUFA12 | rs61935751 | 12 | 95397032 | T | C | 0.0228911 | -0.53084 | 0.0700238 | 5.74E-119 |
| NDUFA12 | rs113220345 | 12 | 95438797 | C | T | 0.0484169 | -0.336705 | 0.0152934 | 3.54E-12 |
| NDUFA12 | rs7358643 | 12 | 95489131 | G | A | 0.0116988 | -0.525765 | 0.346456 | 1.00E-200 |
| NDUFA12 | rs116867473 | 12 | 95337320 | T | G | 0.0432172 | -0.418732 | 0.0192097 | 3.36E-22 |
| NDUFA12 | rs117916697 | 12 | 95337762 | C | A | 0.0444286 | 0.720939 | 0.017939 | 3.26E-59 |
| NDUFA12 | rs2886830 | 12 | 95338804 | T | C | 0.0334781 | -0.438547 | 0.0322674 | 3.31E-39 |
| NDUFA12 | rs151297994 | 12 | 95348642 | C | T | 0.0362044 | 0.732903 | 0.0269912 | 4.06E-91 |
| NDUFA12 | rs74512707 | 12 | 95350637 | A | G | 0.0178029 | 0.551958 | 0.118738 | 1.00E-200 |
| NDUFA12 | rs7310122 | 12 | 95356348 | G | A | 0.0120559 | 0.0704918 | 0.582872 | 5.00E-09 |
| NDUFA12 | rs150156754 | 12 | 95359445 | T | C | 0.0444584 | -0.497094 | 0.0180918 | 5.04E-29 |
| NDUFA12 | rs140279427 | 12 | 95386634 | T | C | 0.0485979 | 0.328944 | 0.0151807 | 1.30E-11 |
| NDUFA12 | rs117264318 | 12 | 95460720 | T | C | 0.0527267 | -0.501368 | 0.0128251 | 1.93E-21 |
| NDUFA12 | rs73221778 | 12 | 95482495 | A | C | 0.0300108 | 0.79777 | 0.0389749 | 1.08E-155 |
| NDUFA13 | rs7259773 | 19 | 19611774 | A | G | 0.0268878 | 0.225083 | 0.0513977 | 5.71E-17 |
| NDUFA13 | rs8109130 | 19 | 19668738 | G | A | 0.0120621 | -0.0712895 | 0.415546 | 3.42E-09 |
| NDUFA13 | rs12974028 | 19 | 19666506 | A | G | 0.0137175 | -0.0766811 | 0.25067 | 2.27E-08 |
| NDUFA13 | rs4808973 | 19 | 19725456 | G | A | 0.0152099 | -0.18684 | 0.813845 | 1.10E-34 |
| NDUFA13 | rs11085264 | 19 | 19621780 | G | A | 0.0162409 | 0.244263 | 0.156751 | 4.02E-51 |
| NDUFAB1 | rs442764 | 16 | 23609390 | C | T | 0.0203367 | -0.121493 | 0.0943333 | 2.31E-09 |
| NDUFAF1 | rs1757463 | 15 | 41783814 | G | A | 0.0129422 | -0.273888 | 0.287816 | 2.12E-99 |
| NDUFAF1 | rs8033095 | 15 | 41606016 | G | A | 0.04502 | -0.616157 | 0.0175568 | 1.22E-42 |
| NDUFAF1 | rs116856005 | 15 | 41762025 | G | A | 0.0364132 | -0.287449 | 0.0273464 | 2.92E-15 |
| NDUFAF1 | rs76051793 | 15 | 41730011 | A | G | 0.0458146 | -0.45471 | 0.0170502 | 3.23E-23 |
| NDUFAF1 | rs35826725 | 15 | 41713219 | G | A | 0.022486 | -0.448647 | 0.0735465 | 1.43E-88 |
| NDUFAF1 | rs28479336 | 15 | 41791978 | A | G | 0.019703 | -0.197725 | 0.100753 | 1.07E-23 |
| NDUFAF1 | rs113727694 | 15 | 41685306 | G | A | 0.0369873 | -0.315198 | 0.0264608 | 1.57E-17 |
| NDUFAF1 | rs113392410 | 15 | 41711065 | A | T | 0.0444155 | -0.564561 | 0.0180801 | 5.14E-37 |
| NDUFAF1 | rs8034626 | 15 | 41612894 | G | A | 0.0127342 | -0.12581 | 0.318194 | 5.09E-23 |
| NDUFAF1 | rs117629515 | 15 | 41771685 | A | G | 0.0287827 | 0.653131 | 0.0431127 | 5.42E-114 |
| NDUFAF1 | rs57285807 | 15 | 41789646 | A | G | 0.0516986 | -0.511185 | 0.0133403 | 4.70E-23 |
| NDUFAF2 | rs158700 | 5 | 60324081 | T | C | 0.0193353 | -0.197819 | 0.894899 | 1.44E-24 |
| NDUFAF2 | rs80120114 | 5 | 60429823 | A | T | 0.0192012 | 0.185164 | 0.106873 | 5.25E-22 |
| NDUFAF2 | rs62367886 | 5 | 60302706 | A | C | 0.0163077 | 0.119121 | 0.157507 | 2.78E-13 |
| NDUFAF2 | rs7723349 | 5 | 60323753 | G | T | 0.0132831 | -0.08757 | 0.27673 | 4.32E-11 |
| NDUFAF2 | rs12519764 | 5 | 60412819 | T | C | 0.0162796 | 0.117675 | 0.158193 | 4.89E-13 |
| NDUFAF2 | rs4700401 | 5 | 60168165 | C | A | 0.0138967 | 0.108863 | 0.75955 | 4.73E-15 |
| NDUFAF2 | rs78984066 | 5 | 60250062 | G | A | 0.0423364 | 0.239772 | 0.0201235 | 1.48E-08 |
| NDUFAF2 | rs2650507 | 5 | 60291776 | T | C | 0.0120227 | -0.192194 | 0.596381 | 1.60E-57 |
| NDUFAF2 | rs12516552 | 5 | 60177527 | G | C | 0.0164651 | 0.118759 | 0.153858 | 5.49E-13 |
| NDUFAF2 | rs28634357 | 5 | 60544386 | G | A | 0.0128884 | -0.0969647 | 0.693911 | 5.34E-14 |
| NDUFAF2 | rs11744226 | 5 | 60410899 | A | G | 0.0174916 | -0.0966831 | 0.133297 | 3.25E-08 |
| NDUFAF2 | rs12522154 | 5 | 60181500 | C | T | 0.0123767 | 0.193723 | 0.349343 | 3.21E-55 |
| NDUFAF2 | rs295564 | 5 | 60398992 | G | A | 0.0124028 | -0.18138 | 0.652185 | 1.97E-48 |
| NDUFAF2 | rs162232 | 5 | 60308047 | G | A | 0.0153069 | -0.116991 | 0.184664 | 2.12E-14 |
| NDUFAF2 | rs173946 | 5 | 60488297 | C | T | 0.0122334 | -0.0769368 | 0.38184 | 3.19E-10 |
| NDUFAF2 | rs1038144 | 5 | 60199201 | T | C | 0.0203242 | -0.220007 | 0.906141 | 2.63E-27 |
| NDUFAF3 | rs7621347 | 3 | 49110889 | C | T | 0.014063 | 0.185043 | 0.770288 | 1.53E-39 |
| NDUFAF3 | rs7632477 | 3 | 49120040 | G | A | 0.0130398 | 0.0840665 | 0.294367 | 1.14E-10 |
| NDUFAF3 | rs4974078 | 3 | 49009386 | T | C | 0.0118718 | 0.106373 | 0.490736 | 3.25E-19 |
| NDUFAF3 | rs55786114 | 3 | 48982335 | T | C | 0.0229829 | -0.179322 | 0.0719514 | 6.07E-15 |
| NDUFAF4 | rs11759571 | 6 | 97338341 | G | T | 0.0284221 | 0.170595 | 0.0458406 | 1.95E-09 |
| NDUFB1 | rs4904835 | 14 | 92560527 | G | A | 0.0142986 | -0.0861433 | 0.222182 | 1.70E-09 |
| NDUFB1 | rs12433965 | 14 | 92579741 | C | T | 0.0159551 | -0.115879 | 0.166285 | 3.79E-13 |
| NDUFB1 | rs1009170 | 14 | 92636713 | T | A | 0.0139828 | 0.101467 | 0.236379 | 3.98E-13 |
| NDUFB1 | rs12896486 | 14 | 92498824 | G | T | 0.0131654 | 0.0732811 | 0.28535 | 2.61E-08 |
| NDUFB1 | rs61976560 | 14 | 92587277 | T | G | 0.0123219 | -0.258161 | 0.345964 | 1.81E-97 |
| NDUFB1 | rs17783552 | 14 | 92571929 | A | G | 0.0213308 | 0.160862 | 0.0847173 | 4.66E-14 |
| NDUFB1 | rs28667523 | 14 | 92605878 | G | A | 0.0239332 | 0.309804 | 0.0653932 | 2.53E-38 |
| NDUFB2 | rs4727053 | 7 | 140398149 | G | A | 0.0217757 | -0.499106 | 0.0781274 | 2.91E-116 |
| NDUFB2 | rs112902350 | 7 | 140401099 | G | A | 0.039712 | -0.561941 | 0.0226611 | 1.85E-45 |
| NDUFB2 | rs3829814 | 7 | 140426257 | G | A | 0.0118569 | 0.125073 | 0.500428 | 5.16E-26 |
| NDUFB2 | rs118120087 | 7 | 140498555 | A | G | 0.0346342 | -0.735129 | 0.0294871 | 5.54E-100 |
| NDUFB2 | rs1681777 | 7 | 140321199 | T | C | 0.0120677 | -0.227198 | 0.387242 | 4.54E-79 |
| NDUFB2 | rs149666886 | 7 | 140360259 | C | T | 0.0455179 | -0.394544 | 0.0173062 | 4.40E-18 |
| NDUFB2 | rs6969644 | 7 | 140356334 | G | A | 0.0218081 | -0.69352 | 0.0751501 | 1.00E-200 |
| NDUFB2 | rs1267673 | 7 | 140397792 | C | T | 0.0127156 | -0.390663 | 0.288702 | 1.00E-200 |
| NDUFB2 | rs6964724 | 7 | 140501936 | A | G | 0.0160417 | -0.448347 | 0.154219 | 6.78E-172 |
| NDUFB2 | rs269267 | 7 | 140372299 | C | T | 0.0159525 | -0.126507 | 0.833797 | 2.19E-15 |
| NDUFB5 | rs12493394 | 3 | 179237355 | T | C | 0.0141218 | -0.114182 | 0.770538 | 6.20E-16 |
| NDUFB5 | rs4855085 | 3 | 179236406 | T | A | 0.0118903 | -0.0762812 | 0.513203 | 1.40E-10 |
| NDUFB5 | rs13099605 | 3 | 179242111 | G | C | 0.0131267 | 0.0855387 | 0.28778 | 7.20E-11 |
| NDUFB5 | rs55875831 | 3 | 179340855 | T | G | 0.0212919 | 0.212519 | 0.0847768 | 1.85E-23 |
| NDUFB5 | rs11709023 | 3 | 179356652 | A | G | 0.0214108 | 0.164135 | 0.0840097 | 1.78E-14 |
| NDUFB5 | rs9870194 | 3 | 179370059 | A | G | 0.0139772 | -0.101181 | 0.763344 | 4.52E-13 |
| NDUFB5 | rs116266619 | 3 | 179253799 | A | G | 0.0228737 | -0.140906 | 0.0728267 | 7.27E-10 |
| NDUFB5 | rs6778219 | 3 | 179327958 | A | G | 0.0117675 | -0.236416 | 0.536078 | 8.95E-90 |
| NDUFB5 | rs34529878 | 3 | 179251662 | C | T | 0.0121845 | -0.153941 | 0.381403 | 1.36E-36 |
| NDUFB6 | rs17289402 | 9 | 32468875 | A | G | 0.0187358 | -0.119929 | 0.113504 | 1.54E-10 |
| NDUFB6 | rs10758142 | 9 | 32534499 | T | C | 0.0118772 | 0.122111 | 0.472496 | 8.56E-25 |
| NDUFB6 | rs34692396 | 9 | 32482904 | C | T | 0.0279881 | 0.156703 | 0.0473643 | 2.16E-08 |
| NDUFB6 | rs6476362 | 9 | 32491060 | C | T | 0.014966 | 0.0962915 | 0.196174 | 1.24E-10 |
| NDUFB7 | rs11085898 | 19 | 14679428 | G | A | 0.0119423 | -0.0710877 | 0.547367 | 2.64E-09 |
| NDUFB8 | rs11190588 | 10 | 102273565 | T | C | 0.0143713 | -0.120208 | 0.218341 | 6.03E-17 |
| NDUFB9 | rs6470243 | 8 | 125455583 | G | A | 0.011825 | 0.176044 | 0.475822 | 3.98E-50 |
| NDUFB9 | rs181816068 | 8 | 125527481 | C | G | 0.0367774 | 0.395893 | 0.0266886 | 5.07E-27 |
| NDUFB9 | rs77339380 | 8 | 125471664 | C | A | 0.0221836 | 0.344936 | 0.0766441 | 1.62E-54 |
| NDUFB9 | rs16899688 | 8 | 125569380 | A | C | 0.012018 | -0.147344 | 0.414422 | 1.48E-34 |
| NDUFB9 | rs7830235 | 8 | 125570729 | A | T | 0.0185221 | 0.114237 | 0.116563 | 6.94E-10 |
| NDUFB9 | rs12335318 | 8 | 125607276 | T | C | 0.0203592 | -0.126028 | 0.0940804 | 6.01E-10 |
| NDUFB9 | rs34008273 | 8 | 125461817 | A | C | 0.0172862 | 0.136955 | 0.136712 | 2.32E-15 |
| NDUFB9 | rs34263543 | 8 | 125572817 | C | A | 0.0227622 | 0.265357 | 0.0730543 | 2.10E-31 |
| NDUFB9 | rs4007923 | 8 | 125600644 | C | T | 0.0119376 | -0.0779513 | 0.453364 | 6.58E-11 |
| NDUFB9 | rs4870907 | 8 | 125603057 | G | A | 0.0119619 | 0.0761324 | 0.556051 | 1.96E-10 |
| NDUFB9 | rs3829037 | 8 | 125565328 | C | T | 0.0142305 | 0.248795 | 0.219314 | 1.92E-68 |
| NDUFB9 | rs11776528 | 8 | 125540185 | A | G | 0.0150152 | -0.133257 | 0.193809 | 6.99E-19 |
| NDUFB10 | rs1133099 | 16 | 2015121 | T | C | 0.0180985 | -0.100503 | 0.12305 | 2.80E-08 |
| NDUFB10 | rs7192722 | 16 | 2016479 | A | G | 0.011915 | 0.151984 | 0.557662 | 2.89E-37 |
| NDUFB10 | rs1122949 | 16 | 2033799 | C | G | 0.0132216 | 0.104245 | 0.280338 | 3.16E-15 |
| NDUFB10 | rs338777 | 16 | 2001536 | T | C | 0.0125128 | 0.0752821 | 0.344008 | 1.79E-09 |
| NDUFB10 | rs72764893 | 16 | 2013756 | C | T | 0.0167424 | 0.164603 | 0.147173 | 8.25E-23 |
| NDUFB10 | rs142385527 | 16 | 2050917 | A | C | 0.0139041 | 0.0923581 | 0.240503 | 3.09E-11 |
| NDUFB10 | rs2023274 | 16 | 2003399 | G | T | 0.0134375 | 0.0880289 | 0.266729 | 5.71E-11 |
| NDUFB10 | rs758335 | 16 | 2011126 | G | A | 0.01548 | 0.312528 | 0.826073 | 1.22E-90 |
| NDUFB10 | rs758336 | 16 | 2013314 | C | T | 0.036012 | 0.362648 | 0.972102 | 7.48E-24 |
| NDUFB10 | rs2302175 | 16 | 2009697 | T | C | 0.0339037 | -0.297321 | 0.0316523 | 1.79E-18 |
| NDUFB10 | rs1058502 | 16 | 2047811 | C | T | 0.0119324 | 0.0910141 | 0.547216 | 2.39E-14 |
| NDUFB10 | rs77189484 | 16 | 2072006 | A | C | 0.0441272 | -0.261824 | 0.0184884 | 2.97E-09 |
| NDUFC1 | rs116533347 | 4 | 140228568 | A | G | 0.0351007 | 0.23945 | 0.0295289 | 9.00E-12 |
| NDUFC1 | rs35885016 | 4 | 140231073 | G | A | 0.0119656 | -0.127096 | 0.432541 | 2.36E-26 |
| NDUFC1 | rs13143516 | 4 | 140159339 | A | G | 0.0118973 | 0.0735706 | 0.5204 | 6.26E-10 |
| NDUFC1 | rs3806766 | 4 | 140222371 | A | G | 0.0153237 | 0.259015 | 0.18041 | 4.29E-64 |
| NDUFC1 | rs6820313 | 4 | 140134659 | T | G | 0.0119335 | -0.0854582 | 0.546432 | 8.00E-13 |
| NDUFC2 | rs7949785 | 11 | 77719869 | C | T | 0.0119108 | -0.1036 | 0.540444 | 3.38E-18 |
| NDUFC2 | rs150774871 | 11 | 77733287 | T | C | 0.0416337 | -0.38258 | 0.020745 | 3.95E-20 |
| NDUFC2 | rs4945243 | 11 | 77747841 | G | A | 0.0288815 | 0.269219 | 0.955843 | 1.15E-20 |
| NDUFC2 | rs570456 | 11 | 77823228 | T | C | 0.0136046 | -0.280571 | 0.246606 | 1.69E-94 |
| NDUFC2 | rs140736982 | 11 | 77845448 | A | C | 0.0406377 | 0.243956 | 0.0218741 | 1.94E-09 |
| NDUFC2 | rs112533470 | 11 | 77848867 | T | G | 0.0280858 | 0.314126 | 0.0466928 | 4.86E-29 |
| NDUFC2 | rs680000 | 11 | 77859542 | A | G | 0.0362062 | -0.384926 | 0.0275677 | 2.12E-26 |
| NDUFC2 | rs527462 | 11 | 77883478 | A | G | 0.021667 | -0.313069 | 0.0809005 | 2.54E-47 |
| NDUFC2 | rs636445 | 11 | 77880506 | C | A | 0.0165139 | -0.485971 | 0.142768 | 2.41E-190 |
| NDUFC2 | rs117059759 | 11 | 77713795 | C | T | 0.028787 | 0.234505 | 0.0445289 | 3.76E-16 |
| NDUFC2 | rs7937238 | 11 | 77731416 | T | C | 0.0119518 | 0.215982 | 0.58732 | 5.37E-73 |
| NDUFC2 | rs582732 | 11 | 77768692 | T | C | 0.0160803 | 0.486663 | 0.84836 | 1.00E-200 |
| NDUFC2 | rs10793282 | 11 | 77805236 | A | G | 0.0117253 | 0.262405 | 0.465763 | 6.25E-111 |
| NDUFC2 | rs113390502 | 11 | 77833837 | A | C | 0.0447215 | -0.433199 | 0.0179156 | 3.43E-22 |
| NDUFC2 | rs116896993 | 11 | 77879646 | A | C | 0.03683 | -0.433143 | 0.0265671 | 6.21E-32 |
| NDUFC2 | rs230660 | 11 | 77886785 | T | A | 0.0119044 | -0.165861 | 0.558542 | 4.02E-44 |
| NDUFC2 | rs35414616 | 11 | 77733389 | C | A | 0.0183931 | 0.279342 | 0.116625 | 4.30E-52 |
| NDUFC2 | rs117727861 | 11 | 77745108 | G | A | 0.0402631 | 0.279116 | 0.0222732 | 4.14E-12 |
| NDUFC2 | rs1450763 | 11 | 77754603 | G | A | 0.0140287 | 0.0774989 | 0.234676 | 3.31E-08 |
| NDUFC2 | rs61900223 | 11 | 77799871 | A | G | 0.0272593 | -0.446253 | 0.0492046 | 3.09E-60 |
| NDUFC2 | rs61995925 | 11 | 77823791 | T | C | 0.0415237 | 0.311727 | 0.0208996 | 6.04E-14 |
| NDUFC2 | rs4945232 | 11 | 77710332 | T | C | 0.0146759 | -0.148639 | 0.205518 | 4.14E-24 |
| NDUFC2 | rs117003832 | 11 | 77775352 | T | C | 0.0499702 | -0.377984 | 0.0143344 | 3.90E-14 |
| NDUFC2 | rs146268151 | 11 | 77788277 | A | G | 0.0435123 | 0.252497 | 0.0190271 | 6.52E-09 |
| NDUFC2 | rs595707 | 11 | 77887217 | T | C | 0.0163725 | -0.129595 | 0.155853 | 2.46E-15 |
| NDUFS1 | rs7570646 | 2 | 206993133 | G | A | 0.0121394 | -0.0877294 | 0.397481 | 4.95E-13 |
| NDUFS2 | rs34884997 | 1 | 161160872 | C | T | 0.0167458 | -0.278916 | 0.144876 | 2.74E-62 |
| NDUFS2 | rs72714918 | 1 | 161174370 | T | C | 0.0413626 | 0.38025 | 0.0210237 | 3.82E-20 |
| NDUFS2 | rs12122674 | 1 | 161205966 | T | G | 0.0311676 | -0.214302 | 0.0377705 | 6.16E-12 |
| NDUFS2 | rs4078017 | 1 | 161074092 | A | G | 0.0221239 | -0.188295 | 0.0781012 | 1.72E-17 |
| NDUFS2 | rs12133979 | 1 | 161079031 | T | C | 0.0386631 | -0.239518 | 0.0242194 | 5.82E-10 |
| NDUFS2 | rs4433413 | 1 | 161231962 | T | C | 0.0165173 | -0.0965025 | 0.152908 | 5.14E-09 |
| NDUFS2 | rs41270847 | 1 | 161184976 | A | G | 0.0480371 | -0.317381 | 0.0155453 | 3.92E-11 |
| NDUFS2 | rs4489574 | 1 | 161189713 | T | C | 0.01273 | 0.203291 | 0.31215 | 2.09E-57 |
| NDUFS2 | rs4078110 | 1 | 161228800 | T | C | 0.014493 | -0.183447 | 0.211472 | 1.02E-36 |
| NDUFS2 | rs148819660 | 1 | 161100203 | T | C | 0.0499033 | -0.27363 | 0.0144015 | 4.18E-08 |
| NDUFS2 | rs11588018 | 1 | 161112911 | A | G | 0.0306913 | -0.241577 | 0.0389596 | 3.51E-15 |
| NDUFS2 | rs2307420 | 1 | 161202556 | C | T | 0.0369408 | -0.260895 | 0.026573 | 1.63E-12 |
| NDUFS2 | rs12721036 | 1 | 161191681 | T | G | 0.0193232 | -0.211593 | 0.105122 | 6.62E-28 |
| NDUFS2 | rs4656985 | 1 | 161079155 | C | T | 0.0121246 | -0.210591 | 0.381356 | 1.42E-67 |
| NDUFS2 | rs11583589 | 1 | 161159158 | T | G | 0.0196255 | -0.238733 | 0.101272 | 4.80E-34 |
| NDUFS2 | rs12740751 | 1 | 161167989 | A | G | 0.0408282 | -0.248631 | 0.0216641 | 1.13E-09 |
| NDUFS2 | rs2501862 | 1 | 161232772 | A | C | 0.0120946 | -0.0975379 | 0.405408 | 7.35E-16 |
| NDUFS2 | rs112803994 | 1 | 161174935 | T | G | 0.0288577 | -0.314777 | 0.0441286 | 1.06E-27 |
| NDUFS2 | rs1136224 | 1 | 161184097 | G | A | 0.0160313 | 0.328642 | 0.159189 | 2.15E-93 |
| NDUFS2 | rs4379692 | 1 | 161186313 | T | C | 0.0126647 | -0.330252 | 0.301759 | 6.71E-150 |
| NDUFS2 | rs11265564 | 1 | 161164166 | G | A | 0.0119698 | -0.120845 | 0.567346 | 5.78E-24 |
| NDUFS2 | rs16832694 | 1 | 161176806 | G | A | 0.0225226 | -0.221088 | 0.0749803 | 9.57E-23 |
| NDUFS4 | rs256092 | 5 | 53026986 | G | A | 0.013149 | -0.142619 | 0.283641 | 2.07E-27 |
| NDUFS4 | rs72753638 | 5 | 52916696 | C | G | 0.0179649 | -0.152953 | 0.124764 | 1.68E-17 |
| NDUFS4 | rs141633076 | 5 | 52980107 | T | G | 0.0260696 | 0.233717 | 0.0548335 | 3.10E-19 |
| NDUFS4 | rs3958630 | 5 | 52853386 | A | G | 0.0160508 | 0.212332 | 0.162087 | 6.00E-40 |
| NDUFS4 | rs112340805 | 5 | 53033103 | C | T | 0.0163862 | -0.131829 | 0.155507 | 8.61E-16 |
| NDUFS4 | rs530216 | 5 | 53049825 | A | G | 0.0125232 | 0.082917 | 0.657568 | 3.56E-11 |
| NDUFS4 | rs62370480 | 5 | 52774510 | A | G | 0.0148177 | -0.0909745 | 0.201514 | 8.27E-10 |
| NDUFS4 | rs12516704 | 5 | 52833426 | C | T | 0.0123308 | -0.0744993 | 0.367225 | 1.52E-09 |
| NDUFS4 | rs114082817 | 5 | 52867705 | G | T | 0.0262732 | 0.232797 | 0.0539431 | 7.96E-19 |
| NDUFS4 | rs427527 | 5 | 52902307 | G | A | 0.0121797 | -0.127334 | 0.385785 | 1.40E-25 |
| NDUFS4 | rs6897299 | 5 | 52916626 | C | T | 0.0118748 | 0.125512 | 0.472371 | 4.13E-26 |
| NDUFS4 | rs1363972 | 5 | 52799618 | C | T | 0.0140813 | -0.129565 | 0.230899 | 3.53E-20 |
| NDUFS4 | rs4147744 | 5 | 52977580 | A | T | 0.0161264 | 0.214411 | 0.160187 | 2.46E-40 |
| NDUFS4 | rs1833886 | 5 | 52762889 | G | A | 0.0125002 | -0.0865014 | 0.655128 | 4.52E-12 |
| NDUFS4 | rs138223852 | 5 | 52924330 | T | C | 0.0485175 | 0.273095 | 0.0152472 | 1.82E-08 |
| NDUFS4 | rs7736891 | 5 | 52808873 | A | G | 0.0120173 | 0.0714815 | 0.57299 | 2.71E-09 |
| NDUFS4 | rs443254 | 5 | 52910047 | A | T | 0.0165928 | -0.0916767 | 0.151266 | 3.29E-08 |
| NDUFS4 | rs116636806 | 5 | 53011572 | T | G | 0.0306783 | 0.174477 | 0.039079 | 1.29E-08 |
| NDUFS5 | rs4970565 | 1 | 39399647 | A | C | 0.0127404 | 0.177876 | 0.313619 | 2.68E-44 |
| NDUFS5 | rs61782280 | 1 | 39408583 | A | G | 0.0274704 | -0.393568 | 0.0486343 | 1.48E-46 |
| NDUFS5 | rs79084607 | 1 | 39458488 | T | C | 0.0462214 | 0.475733 | 0.0167373 | 7.63E-25 |
| NDUFS5 | rs192516675 | 1 | 39466344 | C | T | 0.0425233 | -0.352382 | 0.0198909 | 1.16E-16 |
| NDUFS5 | rs76682984 | 1 | 39508631 | A | G | 0.0511872 | -0.287815 | 0.0136765 | 1.88E-08 |
| NDUFS5 | rs6692358 | 1 | 39525077 | A | T | 0.0146047 | 0.230126 | 0.794611 | 6.13E-56 |
| NDUFS5 | rs56385749 | 1 | 39532598 | T | C | 0.0306934 | -0.686156 | 0.0377396 | 1.07E-110 |
| NDUFS5 | rs7555014 | 1 | 39573219 | A | C | 0.0210552 | 0.169736 | 0.0871298 | 7.54E-16 |
| NDUFS5 | rs112386618 | 1 | 39583883 | A | G | 0.0391208 | -0.238336 | 0.0236442 | 1.11E-09 |
| NDUFS5 | rs11205665 | 1 | 39590824 | T | C | 0.0240072 | -0.162886 | 0.0655605 | 1.16E-11 |
| NDUFS5 | rs116403221 | 1 | 39465517 | G | T | 0.0315536 | 0.566387 | 0.0360871 | 4.80E-72 |
| NDUFS5 | rs79346115 | 1 | 39473320 | G | A | 0.0378997 | 0.510983 | 0.0249714 | 1.99E-41 |
| NDUFS5 | rs1555743 | 1 | 39482930 | C | T | 0.0332443 | 0.384999 | 0.967172 | 5.14E-31 |
| NDUFS5 | rs112700257 | 1 | 39508152 | A | G | 0.0164201 | 0.2833 | 0.151675 | 1.06E-66 |
| NDUFS5 | rs145232426 | 1 | 39543199 | G | A | 0.031123 | 0.578901 | 0.0370692 | 3.20E-77 |
| NDUFS5 | rs3736890 | 1 | 39549983 | A | G | 0.0152143 | 0.388795 | 0.177921 | 4.91E-144 |
| NDUFS5 | rs11810286 | 1 | 39399298 | T | C | 0.0295537 | -0.171317 | 0.0422452 | 6.76E-09 |
| NDUFS5 | rs147594332 | 1 | 39429026 | T | C | 0.0474115 | -0.569042 | 0.0158508 | 3.45E-33 |
| NDUFS5 | rs146442332 | 1 | 39431712 | T | C | 0.0141528 | 0.309344 | 0.219039 | 6.61E-106 |
| NDUFS5 | rs143557438 | 1 | 39454379 | A | G | 0.0414974 | -0.686712 | 0.0206036 | 1.64E-61 |
| NDUFS5 | rs77335069 | 1 | 39464977 | A | G | 0.0241184 | 0.55956 | 0.062575 | 4.51E-119 |
| NDUFS5 | rs55723607 | 1 | 39487995 | A | G | 0.0509952 | -0.652728 | 0.0136518 | 1.64E-37 |
| NDUFS5 | rs149413236 | 1 | 39511337 | A | G | 0.012011 | 0.240834 | 0.606084 | 1.97E-89 |
| NDUFS5 | rs28887876 | 1 | 39540438 | A | G | 0.0116701 | 0.591536 | 0.326923 | 1.00E-200 |
| NDUFS5 | rs11205632 | 1 | 39555643 | A | G | 0.0202515 | 0.1464 | 0.095097 | 4.87E-13 |
| NDUFS5 | rs55693866 | 1 | 39578808 | T | C | 0.0152063 | -0.212854 | 0.185512 | 1.60E-44 |
| NDUFS5 | rs7416141 | 1 | 39415978 | A | G | 0.0234286 | -0.182087 | 0.0690246 | 7.71E-15 |
| NDUFS5 | rs147152235 | 1 | 39436808 | T | G | 0.0246757 | -0.601058 | 0.0593528 | 4.72E-131 |
| NDUFS5 | rs72660024 | 1 | 39436950 | G | C | 0.0133675 | -0.682645 | 0.212465 | 1.00E-200 |
| NDUFS5 | rs7547481 | 1 | 39450334 | C | T | 0.0270522 | 0.539562 | 0.0495307 | 1.65E-88 |
| NDUFS5 | rs4422996 | 1 | 39456076 | T | C | 0.0242058 | -0.689693 | 0.0608751 | 1.43E-178 |
| NDUFS5 | rs114041894 | 1 | 39457910 | G | A | 0.0336699 | 0.359265 | 0.0320222 | 1.40E-26 |
| NDUFS5 | rs113946027 | 1 | 39473001 | T | C | 0.0356639 | 0.533535 | 0.0282117 | 1.34E-50 |
| NDUFS5 | rs146704904 | 1 | 39488552 | T | C | 0.0308505 | -0.294157 | 0.0384599 | 1.50E-21 |
| NDUFS5 | rs138288629 | 1 | 39502892 | A | G | 0.0467137 | -0.265053 | 0.0164673 | 1.39E-08 |
| NDUFS5 | rs260974 | 1 | 39548798 | G | T | 0.0202899 | -0.37628 | 0.092568 | 8.92E-77 |
| NDUFS5 | rs7546735 | 1 | 39550621 | C | T | 0.0133905 | 0.138155 | 0.267793 | 5.88E-25 |
| NDUFS5 | rs75977446 | 1 | 39563715 | A | G | 0.0398701 | -0.479964 | 0.0225669 | 2.23E-33 |
| NDUFS5 | rs13374459 | 1 | 39571211 | C | T | 0.0120356 | 0.166496 | 0.406563 | 1.60E-43 |
| NDUFS5 | rs75441027 | 1 | 39401840 | T | G | 0.0302299 | -0.50035 | 0.0395924 | 1.56E-61 |
| NDUFS5 | rs7553264 | 1 | 39403751 | G | A | 0.0233699 | -0.201137 | 0.930672 | 7.53E-18 |
| NDUFS5 | rs74829317 | 1 | 39439644 | C | T | 0.0108015 | 0.640823 | 0.416434 | 1.00E-200 |
| NDUFS5 | rs11205485 | 1 | 39441862 | C | G | 0.0144365 | -0.386361 | 0.202946 | 8.71E-158 |
| NDUFS5 | rs147135985 | 1 | 39474650 | C | T | 0.0415579 | 0.341755 | 0.0208476 | 1.98E-16 |
| NDUFS5 | rs11589220 | 1 | 39484754 | G | T | 0.0202759 | -0.756197 | 0.0857966 | 1.00E-200 |
| NDUFS5 | rs145350505 | 1 | 39517576 | T | C | 0.0450364 | -0.519126 | 0.017612 | 9.67E-31 |
| NDUFS5 | rs112978585 | 1 | 39543029 | T | C | 0.0310898 | -0.68141 | 0.0367961 | 1.77E-106 |
| NDUFS5 | rs9659165 | 1 | 39545269 | T | C | 0.0282153 | -0.229495 | 0.0464456 | 4.16E-16 |
| NDUFS5 | rs260977 | 1 | 39545507 | A | G | 0.01349 | -0.185719 | 0.259328 | 4.00E-43 |
| NDUFS5 | rs76104968 | 1 | 39550261 | T | C | 0.0181924 | 0.353215 | 0.118223 | 5.72E-84 |
| NDUFS6 | rs13187162 | 5 | 1799865 | G | A | 0.0175759 | 0.103107 | 0.86825 | 4.45E-09 |
| NDUFS6 | rs4975847 | 5 | 1796813 | C | T | 0.0123918 | 0.0722243 | 0.640954 | 5.60E-09 |
| NDUFS8 | rs61887548 | 11 | 67849583 | C | T | 0.0485609 | -0.44728 | 0.0151617 | 3.24E-20 |
| NDUFS8 | rs11228089 | 11 | 67716826 | C | T | 0.0230667 | -0.323269 | 0.0706543 | 1.27E-44 |
| NDUFS8 | rs12574652 | 11 | 67736017 | C | A | 0.0122346 | -0.101547 | 0.379593 | 1.04E-16 |
| NDUFS8 | rs138348452 | 11 | 67706564 | C | T | 0.0368788 | 0.224588 | 0.0266898 | 1.13E-09 |
| NDUFS8 | rs142776817 | 11 | 67731486 | A | G | 0.040089 | 0.416842 | 0.0223744 | 2.54E-25 |
| NDUFS8 | rs114984737 | 11 | 67734144 | G | A | 0.0189004 | -0.183478 | 0.110776 | 2.79E-22 |
| NDUFS8 | rs190351597 | 11 | 67737973 | C | A | 0.0478153 | 0.309589 | 0.0156942 | 9.51E-11 |
| NDUFS8 | rs2375187 | 11 | 67747782 | T | C | 0.013947 | 0.422091 | 0.218951 | 1.00E-200 |
| NDUFS8 | rs35162070 | 11 | 67770930 | A | G | 0.0171727 | -0.203136 | 0.137978 | 2.76E-32 |
| NDUFS8 | rs117602660 | 11 | 67776283 | T | C | 0.0455497 | -0.370939 | 0.0172925 | 3.84E-16 |
| NDUFS8 | rs112356410 | 11 | 67777216 | A | G | 0.0455474 | 0.656621 | 0.0171204 | 4.09E-47 |
| NDUFS8 | rs12789057 | 11 | 67785118 | A | G | 0.0240784 | 0.395034 | 0.0640595 | 1.73E-60 |
| NDUFS8 | rs1051806 | 11 | 67804074 | T | C | 0.0155538 | 0.474154 | 0.164412 | 1.00E-200 |
| NDUFS8 | rs118131364 | 11 | 67884138 | G | C | 0.0278049 | -0.41396 | 0.0473529 | 3.93E-50 |
| NDUFS8 | rs191744921 | 11 | 67752654 | A | G | 0.040345 | 0.544633 | 0.0219677 | 1.58E-41 |
| NDUFS8 | rs1104739 | 11 | 67802907 | C | A | 0.0117294 | 0.358489 | 0.407775 | 1.00E-200 |
| NDUFS8 | rs3133269 | 11 | 67804156 | T | C | 0.0129537 | 0.455242 | 0.736389 | 1.00E-200 |
| NDUFS8 | rs141151466 | 11 | 67866003 | A | G | 0.0332878 | 0.425542 | 0.0326696 | 2.02E-37 |
| NDUFS8 | rs11604971 | 11 | 67874054 | G | T | 0.0517627 | -0.404029 | 0.0133419 | 5.92E-15 |
| NDUFS8 | rs308324 | 11 | 67700907 | G | T | 0.017666 | 0.340413 | 0.12663 | 9.71E-83 |
| NDUFS8 | rs11228088 | 11 | 67715003 | G | T | 0.0337254 | 0.222598 | 0.0320771 | 4.11E-11 |
| NDUFS8 | rs149040964 | 11 | 67751959 | T | C | 0.0336866 | -0.392985 | 0.0319377 | 1.90E-31 |
| NDUFS8 | rs3763942 | 11 | 67775101 | G | A | 0.016325 | -0.369933 | 0.151077 | 1.09E-113 |
| NDUFS8 | rs188948613 | 11 | 67730035 | A | G | 0.0341396 | -0.313678 | 0.0311847 | 3.99E-20 |
| NDUFS8 | rs74777484 | 11 | 67771666 | T | C | 0.0231251 | 0.537675 | 0.0684874 | 1.40E-119 |
| NDUFS8 | rs10896288 | 11 | 67797705 | G | C | 0.0119949 | -0.155821 | 0.581875 | 1.39E-38 |
| NDUFS8 | rs75837226 | 11 | 67813671 | T | C | 0.0432144 | 0.416963 | 0.0192134 | 4.98E-22 |
| NDUFS8 | rs72926467 | 11 | 67814843 | T | C | 0.034106 | -0.35089 | 0.0311995 | 7.97E-25 |
| NDUFS8 | rs78528297 | 11 | 67826193 | G | A | 0.0278634 | -0.342811 | 0.0473885 | 8.68E-35 |
| NDUFS8 | rs149720654 | 11 | 67836890 | A | G | 0.0275577 | -0.413649 | 0.0482389 | 6.28E-51 |
| NDUFS8 | rs77055773 | 11 | 67886676 | C | T | 0.0297914 | 0.629015 | 0.0403158 | 5.91E-99 |
| NDUFS8 | rs112300475 | 11 | 67897749 | C | G | 0.0396394 | 0.50532 | 0.0228077 | 3.21E-37 |
| NDUFV2 | rs11660603 | 18 | 9129858 | A | G | 0.0149762 | -0.146235 | 0.80516 | 1.60E-22 |
| NDUFV2 | rs4581767 | 18 | 9089262 | A | G | 0.0148985 | 0.0913562 | 0.801388 | 8.68E-10 |
| NDUFV2 | rs2279992 | 18 | 9102509 | C | T | 0.0123147 | -0.084549 | 0.368873 | 6.61E-12 |
| NDUFV2 | rs67844581 | 18 | 9031217 | A | C | 0.0132853 | 0.0870144 | 0.276601 | 5.77E-11 |
| NDUFV3 | rs73231639 | 21 | 44215530 | C | T | 0.0189251 | 0.184348 | 0.11044 | 2.02E-22 |
| NDUFV3 | rs59463001 | 21 | 44222743 | T | C | 0.0161559 | 0.123329 | 0.838885 | 2.28E-14 |
| NDUFV3 | rs9975817 | 21 | 44228727 | A | G | 0.0240764 | 0.93535 | 0.941354 | 1.00E-200 |
| NDUFV3 | rs8129552 | 21 | 44346922 | G | A | 0.0136471 | -0.144164 | 0.252428 | 4.39E-26 |
| NDUFV3 | rs34017520 | 21 | 44292674 | C | T | 0.0234821 | 0.141923 | 0.0688107 | 1.51E-09 |
| NDUFV3 | rs28811283 | 21 | 44374348 | T | A | 0.0145713 | 0.12369 | 0.210154 | 2.10E-17 |
| NDUFV3 | rs9325643 | 21 | 44238546 | G | A | 0.0135179 | 0.197014 | 0.742944 | 4.09E-48 |
| NDUFV3 | rs6586350 | 21 | 44239035 | C | A | 0.0126923 | 0.223182 | 0.313392 | 3.27E-69 |
| NDUFV3 | rs147228192 | 21 | 44330646 | G | A | 0.0238795 | -0.82311 | 0.0610218 | 1.00E-200 |
| NDUFV3 | rs71320571 | 21 | 44333099 | A | G | 0.0229809 | 0.13271 | 0.0721167 | 7.70E-09 |
| NDUFV3 | rs6586267 | 21 | 44345966 | A | G | 0.0117203 | 0.295799 | 0.557095 | 1.53E-140 |
| NDUFV3 | rs147825839 | 21 | 44352360 | C | T | 0.0396366 | -0.742477 | 0.022507 | 2.71E-78 |
| NDUFV3 | rs234697 | 21 | 44379846 | C | T | 0.0118104 | 0.180659 | 0.513567 | 8.03E-53 |
| NDUFV3 | rs145877804 | 21 | 44261897 | A | C | 0.032155 | 0.194638 | 0.0354266 | 1.42E-09 |
| NDUFV3 | rs7277944 | 21 | 44366955 | G | T | 0.0157405 | 0.108144 | 0.172121 | 6.40E-12 |
| NDUFV3 | rs13052802 | 21 | 44345369 | C | T | 0.0142163 | 0.197039 | 0.222369 | 1.11E-43 |
| NDUFV3 | rs9976191 | 21 | 44358783 | A | G | 0.0147588 | 0.143758 | 0.797423 | 2.02E-22 |
| NDUFV3 | rs429121 | 21 | 44365024 | T | C | 0.0118023 | 0.184048 | 0.498987 | 7.95E-55 |
| NDUFV3 | rs9984199 | 21 | 44215058 | G | A | 0.0312596 | 0.899255 | 0.964496 | 5.48E-182 |
| NDUFV3 | rs451887 | 21 | 44371114 | C | T | 0.0188332 | 0.289373 | 0.889579 | 2.81E-53 |
| NDUFV3 | rs138469847 | 21 | 44222819 | G | A | 0.0126025 | 0.110066 | 0.332189 | 2.47E-18 |
| NDUFV3 | rs147383385 | 21 | 44263958 | T | C | 0.0467965 | -0.556462 | 0.0162803 | 1.31E-32 |
| NDUFV3 | rs112112626 | 21 | 44304725 | T | C | 0.0241535 | 0.142556 | 0.0647645 | 3.59E-09 |
| NDUFV3 | rs79511125 | 21 | 44331615 | A | G | 0.020822 | 0.194181 | 0.0891523 | 1.10E-20 |
| NDUFV3 | rs117131358 | 21 | 44370404 | T | G | 0.0336882 | -0.882948 | 0.0307072 | 2.07E-151 |
| NDUFV3 | rs62217656 | 21 | 44391022 | G | A | 0.0193614 | 0.143038 | 0.1052 | 1.49E-13 |
| NDUFV3 | rs7281371 | 21 | 44402958 | C | T | 0.0210364 | 0.385725 | 0.914506 | 4.26E-75 |
