# Supplementary material for: Deciphering the Role of Metformin in Abdominal Aortic Aneurysm Progression: Insights from Two-Step Mendelian Randomization and Colocalization Analysis
Source: Research Square preprint supplement (doi:10.21203/rs.3.rs-6834737/v1), 2025-06-27
Supplement: Supplementary file 3 [file 2f4d8ac0c4fb8cf79eda4c1d.docx]

**Supplementary File 5. Table.** Selection of SNPs genetically associated with GDF15 target.

| **Gene** | **SNP** | **chr** | **pos** | **Effect allele** | **Other allele** | **se** | **beta** | **eaf** | **pval** |
| --- | --- | --- | --- | --- | --- | --- | --- | --- | --- |
| GDF15 | rs145536188 | 19 | 18502282 | G | A | 0.0273176 | -0.149979 | 0.0498524 | 4.01E-08 |
| GDF15 | rs73009405 | 19 | 18458907 | G | C | 0.0195512 | 0.131751 | 0.102978 | 1.60E-11 |
| GDF15 | rs73007741 | 19 | 18457955 | C | A | 0.0346939 | 0.247177 | 0.0302384 | 1.05E-12 |
| GDF15 | rs8106047 | 19 | 18505741 | A | T | 0.0163183 | -0.126186 | 0.157167 | 1.05E-14 |
| GDF15 | rs4808795 | 19 | 18501035 | A | G | 0.0136045 | 0.282121 | 0.246493 | 1.60E-95 |
| GDF15 | rs111436413 | 19 | 18531654 | T | C | 0.0387881 | 0.260393 | 0.024048 | 1.90E-11 |
| GDF15 | rs113169435 | 19 | 18428607 | T | C | 0.0406679 | 0.224735 | 0.0218494 | 3.28E-08 |
| GDF15 | rs4072287 | 19 | 18475675 | A | C | 0.0130032 | -0.130752 | 0.70491 | 8.71E-24 |
| GDF15 | rs1043063 | 19 | 18480171 | T | C | 0.0124338 | -0.164803 | 0.346094 | 4.26E-40 |
| GDF15 | rs1985157 | 19 | 18513594 | C | T | 0.0121213 | -0.127033 | 0.396235 | 1.07E-25 |
| GDF15 | rs13382142 | 19 | 18516196 | T | C | 0.0171578 | -0.1129 | 0.139389 | 4.70E-11 |
| GDF15 | rs731945 | 19 | 18567039 | T | C | 0.0126728 | 0.091708 | 0.326084 | 4.61E-13 |
| GDF15 | rs17211392 | 19 | 18587172 | T | G | 0.0193986 | 0.19545 | 0.104352 | 7.10E-24 |
