# Supplementary material for: Deciphering the Role of Metformin in Abdominal Aortic Aneurysm Progression: Insights from Two-Step Mendelian Randomization and Colocalization Analysis
Source: Research Square preprint supplement (doi:10.21203/rs.3.rs-6834737/v1), 2025-06-27
Supplement: Supplementary file 4 [file 459536eeb4386b9acbd6a2f6.docx]

**Supplementary File 1. Table**. The SNPs selected as instrumental variables and their genetic associations with metformin and AAA.

| **SNP** | **chr** | **pos** | **Effect allele** | **Other allele** | **Beta exposure** | **Se**  **exposure** | **Eaf**  **exposure** | **Maf**  **exposure** | **Pval**  **exposure** | **R2** | **F** | **Beta**  **outcome** | **Se**  **outcome** | **Pval**  **outcome** |
| --- | --- | --- | --- | --- | --- | --- | --- | --- | --- | --- | --- | --- | --- | --- |
| rs10001190 | 4 | 6284633 | G | A | 0.0026373 | 0.000335655 | 0.632112 | 0.632112 | 3.90E-15 | 0.000133339 | 61.73492877 | 0.0216583 | 0.0254651 | 0.395043 |
| rs10195252 | 2 | 165513091 | C | T | -0.00191685 | 0.000329621 | 0.405055 | 0.594945 | 6.10E-09 | 7.30E-05 | 33.81774437 | -0.00067854 | 0.0254108 | 0.978697 |
| rs10420309 | 19 | 46150182 | G | A | -0.00189448 | 0.000327625 | 0.437532 | 0.562468 | 7.40E-09 | 7.22E-05 | 33.43675364 | 0.0415243 | 0.0248312 | 0.0944735 |
| rs10965246 | 9 | 22132698 | C | T | -0.00429996 | 0.000424723 | 0.176686 | 0.823314 | 4.30E-24 | 0.000221362 | 102.4980009 | 0.0602273 | 0.0341998 | 0.0782312 |
| rs11257655 | 10 | 12307894 | T | C | 0.00273499 | 0.000398227 | 0.208209 | 0.791791 | 6.50E-12 | 0.00010188 | 47.16808072 | -0.0503761 | 0.0279218 | 0.0712016 |
| rs11658063 | 17 | 36103872 | G | C | -0.0026474 | 0.000333353 | 0.602828 | 0.602828 | 2.00E-15 | 0.000136224 | 63.07082575 | 0.00205938 | 0.0269097 | 0.938998 |
| rs11708067 | 3 | 123065778 | G | A | -0.00216544 | 0.000377254 | 0.242368 | 0.757632 | 9.50E-09 | 7.12E-05 | 32.94751973 | -0.00989009 | 0.0323971 | 0.760155 |
| rs1215468 | 13 | 80707429 | G | A | -0.00292874 | 0.00035782 | 0.291405 | 0.708595 | 2.70E-16 | 0.000144694 | 66.99317156 | 0.0427429 | 0.0266221 | 0.108374 |
| rs12555274 | 9 | 22136440 | C | G | 0.00277579 | 0.000373868 | 0.252975 | 0.747025 | 1.10E-13 | 0.00011906 | 55.12324147 | -0.0095996 | 0.0274753 | 0.726797 |
| rs13266634 | 8 | 118184783 | T | C | -0.00254288 | 0.000350136 | 0.309592 | 0.690408 | 3.80E-13 | 0.000113923 | 52.74439605 | -0.00103016 | 0.0252059 | 0.9674 |
| rs1421085 | 16 | 53800954 | C | T | 0.00352358 | 0.000329648 | 0.403451 | 0.596549 | 1.10E-26 | 0.000246741 | 114.2524458 | 0.00176503 | 0.0247691 | 0.943191 |
| rs1496653 | 3 | 23454790 | G | A | -0.00291936 | 0.000401455 | 0.203441 | 0.796559 | 3.50E-13 | 0.000114218 | 52.88100344 | 0.0490853 | 0.0266819 | 0.0658203 |
| rs1613295 | 10 | 80954789 | G | T | 0.00240145 | 0.000327761 | 0.578289 | 0.578289 | 2.40E-13 | 0.000115948 | 53.68224493 | 0.0443993 | 0.0252276 | 0.078417 |
| rs17036160 | 3 | 12329783 | T | C | -0.00313639 | 0.000503572 | 0.117453 | 0.882547 | 4.70E-10 | 8.38E-05 | 38.79136808 | 0.001978 | 0.0323531 | 0.951249 |
| rs17250977 | 5 | 14753745 | G | A | 0.00458709 | 0.000823529 | 0.040221 | 0.959779 | 2.50E-08 | 6.70E-05 | 31.02521872 | -0.15421 | 0.0856907 | 0.0719217 |
| rs17513135 | 1 | 40035686 | T | C | 0.0022746 | 0.000385776 | 0.227468 | 0.772532 | 3.70E-09 | 7.51E-05 | 34.76464364 | 0.0192613 | 0.0299499 | 0.520149 |
| rs1800961 | 20 | 43042364 | T | C | 0.00536609 | 0.000933475 | 0.030964 | 0.969036 | 9.00E-09 | 7.14E-05 | 33.04521987 | 0.164303 | 0.0554502 | 0.00304593 |
| rs2009222 | 19 | 13034543 | C | T | 0.00189842 | 0.000334869 | 0.632367 | 0.632367 | 1.40E-08 | 6.94E-05 | 32.13903513 | -0.038043 | 0.0265027 | 0.151161 |
| rs2796441 | 9 | 84308948 | A | G | -0.00182507 | 0.000327318 | 0.418465 | 0.581535 | 2.50E-08 | 6.72E-05 | 31.08976209 | -0.0178988 | 0.0248173 | 0.470771 |
| rs34744311 | 10 | 94467287 | T | C | -0.00284808 | 0.00033433 | 0.377322 | 0.622678 | 1.60E-17 | 0.000156736 | 72.56910973 | 0.0107324 | 0.0249893 | 0.667575 |
| rs34872471 | 10 | 114754071 | C | T | 0.0085635 | 0.000356221 | 0.291831 | 0.708169 | 1.10E-127 | 0.00124682 | 577.9119713 | -0.0753739 | 0.0305524 | 0.0136235 |
| rs459193 | 5 | 55806751 | G | A | 0.00236399 | 0.000371114 | 0.746628 | 0.746628 | 1.90E-10 | 8.76E-05 | 40.57651254 | 0.0637418 | 0.0262273 | 0.0150838 |
| rs4752792 | 11 | 47815702 | A | G | 0.00209176 | 0.00032437 | 0.544491 | 0.544491 | 1.10E-10 | 8.98E-05 | 41.58536042 | -0.0391498 | 0.0253161 | 0.121998 |
| rs4932264 | 15 | 90422986 | C | T | -0.0022175 | 0.000364805 | 0.729643 | 0.729643 | 1.20E-09 | 7.98E-05 | 36.94909593 | -0.0158897 | 0.0287817 | 0.580895 |
| rs62106258 | 2 | 417167 | C | T | -0.00418623 | 0.000752437 | 0.04854 | 0.95146 | 2.60E-08 | 6.69E-05 | 30.95308987 | 0.191594 | 0.0868918 | 0.0274562 |
| rs67232546 | 11 | 128398938 | T | C | 0.00227404 | 0.000398149 | 0.212505 | 0.787495 | 1.10E-08 | 7.05E-05 | 32.62143521 | -0.00214561 | 0.034553 | 0.950486 |
| rs6768776 | 3 | 186685035 | A | G | -0.002017 | 0.000344962 | 0.364511 | 0.635489 | 5.00E-09 | 7.38E-05 | 34.1875049 | 0.0322598 | 0.0249059 | 0.195228 |
| rs6769511 | 3 | 185530290 | C | T | 0.00318225 | 0.000348036 | 0.315782 | 0.684218 | 6.00E-20 | 0.000180561 | 83.60232911 | -0.000662004 | 0.0265583 | 0.980114 |
| rs7177055 | 15 | 77832762 | A | G | 0.00224939 | 0.000358865 | 0.717474 | 0.717474 | 3.70E-10 | 8.49E-05 | 39.28849893 | -0.00247739 | 0.026599 | 0.925794 |
| rs72802357 | 16 | 75243142 | T | C | -0.00404659 | 0.000606272 | 0.078087 | 0.921913 | 2.50E-11 | 9.62E-05 | 44.54936408 | 0.00684293 | 0.045353 | 0.880069 |
| rs72824077 | 10 | 114596655 | C | T | 0.00215144 | 0.000386051 | 0.226175 | 0.773825 | 2.50E-08 | 6.71E-05 | 31.05755321 | -0.0922774 | 0.0305749 | 0.00254384 |
| rs73188924 | 22 | 50788567 | A | C | 0.00217376 | 0.000389733 | 0.224797 | 0.775203 | 2.40E-08 | 6.72E-05 | 31.1090643 | -0.00278197 | 0.0315594 | 0.929757 |
| rs74567345 | 5 | 102301358 | C | T | 0.0056312 | 0.000750355 | 0.051008 | 0.948992 | 6.20E-14 | 0.000121646 | 56.32049543 | -0.0913619 | 0.0518512 | 0.0780692 |
| rs7482891 | 11 | 2197112 | G | A | -0.00217361 | 0.000334189 | 0.622096 | 0.622096 | 7.80E-11 | 9.14E-05 | 42.30357487 | -0.0120027 | 0.0258124 | 0.641933 |
| rs76550717 | 11 | 72428172 | G | A | -0.00278832 | 0.000444411 | 0.159023 | 0.840977 | 3.50E-10 | 8.50E-05 | 39.36531685 | -0.0408396 | 0.0286272 | 0.153695 |
| rs76675804 | 2 | 43611883 | C | T | -0.00418436 | 0.000539519 | 0.100098 | 0.899902 | 8.80E-15 | 0.000129918 | 60.15098176 | -0.0422415 | 0.0566487 | 0.455864 |
| rs7756992 | 6 | 20679709 | G | A | 0.00319744 | 0.000365589 | 0.266365 | 0.733635 | 2.20E-18 | 0.000165207 | 76.49211883 | -0.0374872 | 0.026022 | 0.149698 |
| rs780093 | 2 | 27742603 | C | T | 0.00206338 | 0.000332018 | 0.615229 | 0.615229 | 5.10E-10 | 8.34E-05 | 38.6218701 | -0.00806928 | 0.0255916 | 0.752527 |
| rs849142 | 7 | 28185891 | C | T | -0.00239601 | 0.00032333 | 0.505093 | 0.505093 | 1.30E-13 | 0.000118608 | 54.91403697 | 0.027032 | 0.024496 | 0.269798 |
| rs8756 | 12 | 66359752 | A | C | 0.00188718 | 0.000324014 | 0.517619 | 0.517619 | 5.70E-09 | 7.33E-05 | 33.92323205 | -0.0547204 | 0.0245807 | 0.026004 |
| rs947791 | 11 | 65302893 | A | G | 0.00228897 | 0.000392464 | 0.217618 | 0.782382 | 5.50E-09 | 7.35E-05 | 34.0156421 | 0.072524 | 0.0423039 | 0.0864629 |
| rs987237 | 6 | 50803050 | G | A | 0.00242652 | 0.0004213 | 0.179582 | 0.820418 | 8.40E-09 | 7.17E-05 | 33.17286306 | -0.0196587 | 0.0298332 | 0.509925 |
| rs9957264 | 18 | 56881633 | A | C | -0.00262705 | 0.000435291 | 0.166478 | 0.833522 | 1.60E-09 | 7.87E-05 | 36.42297581 | -0.000409505 | 0.0285227 | 0.988545 |
