# Supplementary material for: Deciphering the Role of Metformin in Abdominal Aortic Aneurysm Progression: Insights from Two-Step Mendelian Randomization and Colocalization Analysis
Source: Research Square preprint supplement (doi:10.21203/rs.3.rs-6834737/v1), 2025-06-27
Supplement: Supplementary file 5 [file 5665b359b5a77a2ef98efa12.docx]

**Supplementary File 3. Table.** Selection of SNPs genetically associated with AMPK target.

| **Gene** | **SNP** | **chr** | **pos** | **Effect allele** | **Other allele** | **se** | **beta** | **eaf** | **pval** |
| --- | --- | --- | --- | --- | --- | --- | --- | --- | --- |
| PRKAA1 | rs16870378 | 5 | 40831063 | C | T | 0.0178193 | 0.153793 | 0.127138 | 6.10E-18 |
| PRKAA1 | rs3805487 | 5 | 40796033 | T | C | 0.0132636 | 0.134969 | 0.276148 | 2.54E-24 |
| PRKAA1 | rs466962 | 5 | 40803521 | G | A | 0.0128955 | 0.0826289 | 0.693908 | 1.48E-10 |
| PRKAA1 | rs4957342 | 5 | 40694154 | C | T | 0.0135384 | 0.12272 | 0.259475 | 1.25E-19 |
| PRKAA1 | rs144445003 | 5 | 40718687 | T | C | 0.0333914 | 0.201274 | 0.0327619 | 1.66E-09 |
| PRKAA1 | rs62357603 | 5 | 40850283 | A | G | 0.0147955 | -0.0840591 | 0.202427 | 1.34E-08 |
| PRKAB1 | rs117200164 | 12 | 120166558 | A | G | 0.0375424 | -0.577229 | 0.0253623 | 2.39E-53 |
| PRKAB1 | rs11064880 | 12 | 120146824 | T | C | 0.0350547 | -0.42981 | 0.0293865 | 1.46E-34 |
| PRKAB1 | rs117456035 | 12 | 120021501 | C | T | 0.0468267 | -0.382584 | 0.016346 | 3.07E-16 |
| PRKAB1 | rs11064835 | 12 | 120008782 | G | A | 0.0286316 | 0.189888 | 0.0451121 | 3.31E-11 |
| PRKAB1 | rs73221277 | 12 | 120102851 | A | G | 0.033506 | -0.660658 | 0.0317132 | 1.52E-86 |
| PRKAB1 | rs78496826 | 12 | 120147567 | G | A | 0.0350435 | 0.27294 | 0.0295979 | 6.79E-15 |
| PRKAB1 | rs804460 | 12 | 120009262 | T | G | 0.0119227 | -0.0923487 | 0.456867 | 9.51E-15 |
| PRKAB1 | rs1405785 | 12 | 120012291 | G | T | 0.0130286 | -0.0874424 | 0.295119 | 1.92E-11 |
| PRKAB1 | rs73221222 | 12 | 120035504 | G | T | 0.0366819 | 0.258376 | 0.0269607 | 1.87E-12 |
| PRKAB1 | rs73221259 | 12 | 120084274 | A | G | 0.0449267 | 1.04417 | 0.017199 | 1.73E-119 |
| PRKAB1 | rs7963248 | 12 | 120095686 | G | T | 0.0128194 | -0.283396 | 0.295889 | 2.70E-108 |
| PRKAB1 | rs7131896 | 12 | 120206040 | G | T | 0.0134403 | -0.114357 | 0.265685 | 1.76E-17 |
| PRKAB1 | rs59595036 | 12 | 120203179 | G | A | 0.0259124 | 0.194706 | 0.0556422 | 5.74E-14 |
| PRKAB1 | rs11064854 | 12 | 120064168 | G | A | 0.0211658 | -0.604448 | 0.0813742 | 2.25E-179 |
| PRKAB1 | rs17485664 | 12 | 120043595 | C | T | 0.0227316 | 1.06226 | 0.0633862 | 1.00E-200 |
| PRKAB1 | rs141007011 | 12 | 120144497 | C | T | 0.0480387 | -0.469949 | 0.0154864 | 1.33E-22 |
| PRKAB1 | rs149550488 | 12 | 120029548 | A | C | 0.0480819 | -0.409942 | 0.0154836 | 1.51E-17 |
| PRKAB1 | rs6490265 | 12 | 120105707 | C | T | 0.0152041 | -0.238832 | 0.815269 | 1.32E-55 |
| PRKAB1 | rs112088749 | 12 | 120029161 | A | G | 0.0320067 | 0.191045 | 0.0357711 | 2.39E-09 |
| PRKAB1 | rs7961828 | 12 | 120127471 | A | C | 0.0356905 | -0.623735 | 0.0280041 | 2.18E-68 |
| PRKAB1 | rs117872759 | 12 | 120008054 | G | A | 0.0278516 | 0.596178 | 0.046381 | 1.19E-101 |
| PRKAB1 | rs78023419 | 12 | 120179304 | T | C | 0.0311075 | -0.597397 | 0.037047 | 3.40E-82 |
| PRKAB1 | rs7969645 | 12 | 120210906 | G | A | 0.0355872 | -0.602498 | 0.0282097 | 2.69E-64 |
| PRKAB1 | rs7315003 | 12 | 120015591 | G | A | 0.0119772 | 0.136426 | 0.427082 | 4.67E-30 |
| PRKAB1 | rs7976570 | 12 | 120086561 | G | T | 0.0364269 | -0.205251 | 0.027386 | 1.75E-08 |
| PRKAB1 | rs188358766 | 12 | 120146301 | T | A | 0.0235505 | 1.05192 | 0.0594993 | 1.00E-200 |
| PRKAB2 | rs76638383 | 1 | 146556212 | A | G | 0.0251588 | -0.291178 | 0.0589082 | 5.60E-31 |
| PRKAB2 | rs718369 | 1 | 146668894 | C | T | 0.012957 | -0.330068 | 0.280281 | 3.83E-143 |
| PRKAB2 | rs2015856 | 1 | 146695747 | A | G | 0.0169192 | -0.127596 | 0.143979 | 4.64E-14 |
| PRKAB2 | rs12142743 | 1 | 146585620 | T | G | 0.0197102 | 0.306061 | 0.0995634 | 2.24E-54 |
| PRKAB2 | rs12747038 | 1 | 146651428 | G | T | 0.0137442 | 0.0994722 | 0.24866 | 4.57E-13 |
| PRKAB2 | rs188456167 | 1 | 146589301 | A | C | 0.0503988 | -0.360357 | 0.0140943 | 8.67E-13 |
| PRKAB2 | rs78168126 | 1 | 146639664 | C | T | 0.0421502 | -0.26652 | 0.0202939 | 2.56E-10 |
| PRKAB2 | rs184164109 | 1 | 146686976 | T | G | 0.0443509 | -0.368148 | 0.0182545 | 1.03E-16 |
| PRKAB2 | rs7517655 | 1 | 146697394 | G | A | 0.0116621 | 0.347719 | 0.570538 | 2.41E-195 |
| PRKAB2 | rs2003276 | 1 | 146572509 | T | C | 0.0167423 | -0.134546 | 0.147578 | 9.25E-16 |
| PRKAB2 | rs2083719 | 1 | 146593892 | G | C | 0.0118108 | -0.342053 | 0.398497 | 2.03E-184 |
| PRKAB2 | rs76327000 | 1 | 146638960 | C | T | 0.0467363 | 0.408999 | 0.0163988 | 2.11E-18 |
| PRKAB2 | rs12401360 | 1 | 146660447 | G | A | 0.0134184 | 0.332524 | 0.252076 | 1.44E-135 |
| PRKAB2 | rs75435090 | 1 | 146694601 | C | T | 0.0226973 | -0.350176 | 0.072941 | 1.06E-53 |
| PRKAB2 | rs78115332 | 1 | 146701938 | G | C | 0.0133679 | -0.152446 | 0.268522 | 3.99E-30 |
| PRKAB2 | rs142800581 | 1 | 146562264 | G | C | 0.0425819 | -0.24933 | 0.0198842 | 4.76E-09 |
| PRKAB2 | rs56359955 | 1 | 146565981 | A | G | 0.0134973 | -0.333738 | 0.247755 | 5.56E-135 |
| PRKAB2 | rs12725189 | 1 | 146579255 | A | C | 0.0118448 | -0.212912 | 0.443721 | 3.05E-72 |
| PRKAB2 | rs78166327 | 1 | 146646374 | T | C | 0.045616 | -0.312137 | 0.0172655 | 7.77E-12 |
| PRKAB2 | rs17355830 | 1 | 146671073 | C | T | 0.0405257 | -0.224626 | 0.0220063 | 2.98E-08 |
| PRKAB2 | rs145968033 | 1 | 146742891 | T | C | 0.0492475 | -0.35013 | 0.0147717 | 1.16E-12 |
| PRKAB2 | rs145465008 | 1 | 146630173 | C | A | 0.0497868 | -0.335583 | 0.014454 | 1.58E-11 |
| PRKAB2 | rs28381172 | 1 | 146696353 | T | C | 0.047118 | 0.271546 | 0.01618 | 8.26E-09 |
| PRKAB2 | rs190300405 | 1 | 146723214 | T | C | 0.049816 | -0.299454 | 0.0144464 | 1.84E-09 |
| PRKAB2 | rs76536568 | 1 | 146734674 | G | A | 0.025624 | -0.178053 | 0.0570175 | 3.68E-12 |
| PRKAB2 | rs77410359 | 1 | 146741039 | T | C | 0.0534045 | 0.341329 | 0.0125418 | 1.65E-10 |
| PRKAG2 | rs9648720 | 7 | 151230416 | C | T | 0.0244164 | -0.134078 | 0.936701 | 3.99E-08 |
| PRKAG2 | rs11771194 | 7 | 151234237 | A | G | 0.013039 | -0.0894138 | 0.294235 | 7.00E-12 |
| PRKAG2 | rs9640179 | 7 | 151560759 | A | G | 0.0125852 | 0.084652 | 0.335484 | 1.74E-11 |
| PRKAG2 | rs2041639 | 7 | 151224435 | A | G | 0.0118762 | -0.101737 | 0.487841 | 1.07E-17 |
| PRKAG2 | rs6963427 | 7 | 151254828 | T | C | 0.0121871 | -0.279311 | 0.641621 | 3.03E-116 |
| PRKAG2 | rs66794877 | 7 | 151308043 | T | G | 0.012014 | -0.127593 | 0.419235 | 2.40E-26 |
| PRKAG2 | rs35157941 | 7 | 151221139 | C | T | 0.01493 | -0.123164 | 0.196938 | 1.59E-16 |
| PRKAG2 | rs73156292 | 7 | 151275878 | C | T | 0.0352828 | 0.201091 | 0.0292453 | 1.20E-08 |
| PRKAG2 | rs73478069 | 7 | 151322503 | C | A | 0.0177434 | -0.160264 | 0.128341 | 1.68E-19 |
| PRKAG2 | rs62478181 | 7 | 151390467 | A | G | 0.0216148 | 0.119997 | 0.0824541 | 2.83E-08 |
| PRKAG2 | rs2031026 | 7 | 151576111 | G | A | 0.0120246 | -0.0946568 | 0.422007 | 3.49E-15 |
| PRKAG2 | rs78903013 | 7 | 151184620 | T | A | 0.0173924 | -0.108421 | 0.135009 | 4.55E-10 |
| PRKAG2 | rs117440434 | 7 | 151308485 | T | G | 0.0247074 | 0.254056 | 0.0613617 | 8.46E-25 |
| PRKAG2 | rs1997335 | 7 | 151628123 | T | G | 0.0133921 | -0.0872432 | 0.269604 | 7.29E-11 |
| PRKAG2 | rs73156243 | 7 | 151221104 | T | C | 0.0248597 | 0.171678 | 0.0608257 | 4.99E-12 |
| PRKAG2 | rs2538040 | 7 | 151283335 | G | C | 0.0120647 | -0.0736947 | 0.585306 | 1.01E-09 |
| PRKAG2 | rs143828921 | 7 | 151613853 | T | C | 0.0375083 | -0.244521 | 0.0257671 | 7.07E-11 |
| PRKAG2 | rs36011668 | 7 | 151634506 | C | T | 0.0122363 | -0.0897162 | 0.380375 | 2.26E-13 |
| PRKAG2 | rs4469374 | 7 | 151635290 | C | T | 0.0129621 | -0.071644 | 0.699052 | 3.26E-08 |
| PRKAG2 | rs6977084 | 7 | 151303018 | A | G | 0.0179537 | 0.182384 | 0.124632 | 3.04E-24 |
| PRKAG2 | rs2079987 | 7 | 151342640 | G | C | 0.0119798 | -0.0755616 | 0.562204 | 2.84E-10 |
| PRKAG2 | rs57194047 | 7 | 151547849 | A | G | 0.0282561 | -0.155222 | 0.0464286 | 3.94E-08 |
| PRKAG2 | rs6973428 | 7 | 151162953 | C | T | 0.0153393 | -0.169521 | 0.817399 | 2.16E-28 |
| PRKAG2 | rs118035196 | 7 | 151287392 | T | C | 0.0465933 | 0.340653 | 0.0165287 | 2.65E-13 |
| PRKAG2 | rs4726107 | 7 | 151575882 | C | T | 0.0241726 | -0.342536 | 0.0638501 | 1.40E-45 |
| PRKAG2 | rs1881643 | 7 | 151581224 | C | A | 0.0118924 | -0.0826115 | 0.48038 | 3.74E-12 |
| PRKAG3 | rs7603912 | 2 | 219632002 | T | G | 0.0118386 | 0.182734 | 0.461977 | 9.46E-54 |
| PRKAG3 | rs115111187 | 2 | 219590325 | T | C | 0.0192727 | 0.128684 | 0.106386 | 2.44E-11 |
| PRKAG3 | rs694519 | 2 | 219681093 | C | T | 0.0119327 | 0.103847 | 0.550497 | 3.24E-18 |
