# Supplementary material for: Deciphering the Role of Metformin in Abdominal Aortic Aneurysm Progression: Insights from Two-Step Mendelian Randomization and Colocalization Analysis
Source: Research Square preprint supplement (doi:10.21203/rs.3.rs-6834737/v1), 2025-06-27
Supplement: Supplementary file 6 [file 718c768cb6f4ff98831585f8.docx]

**Supplementary File 7. Table.** Selection of SNPs genetically associated with FBP1 target.

| **Gene** | **SNP** | **chr** | **pos** | **Effect Allele** | **Other allele** | **se** | **beta** | **eaf** | **pval** |
| --- | --- | --- | --- | --- | --- | --- | --- | --- | --- |
| FBP1 | rs56144694 | 9 | 97353582 | G | C | 0.0195093 | 0.448259 | 0.0996426 | 8.00E-117 |
| FBP1 | rs4518727 | 9 | 97412258 | G | A | 0.0147319 | -0.110149 | 0.204324 | 7.60E-14 |
| FBP1 | rs117771038 | 9 | 97437641 | A | G | 0.0367235 | 0.367951 | 0.0267991 | 1.25E-23 |
| FBP1 | rs9409577 | 9 | 97279579 | G | T | 0.0130043 | 0.0850767 | 0.297105 | 6.07E-11 |
| FBP1 | rs16910860 | 9 | 97399506 | C | T | 0.0230032 | 0.169646 | 0.0718499 | 1.65E-13 |
| FBP1 | rs7048090 | 9 | 97412341 | A | G | 0.0374465 | 0.223956 | 0.0258672 | 2.22E-09 |
| FBP1 | rs908808 | 9 | 97271988 | C | G | 0.0160452 | 0.164891 | 0.16321 | 8.98E-25 |
| FBP1 | rs149263944 | 9 | 97287224 | A | G | 0.0417941 | 0.489756 | 0.0205047 | 1.03E-31 |
| FBP1 | rs7860616 | 9 | 97265947 | G | A | 0.0119178 | 0.147701 | 0.442699 | 2.84E-35 |
| FBP1 | rs55785529 | 9 | 97305135 | T | C | 0.0341966 | 0.257672 | 0.0311399 | 4.89E-14 |
| FBP1 | rs116996231 | 9 | 97415061 | T | C | 0.0223955 | 0.312027 | 0.0753453 | 4.03E-44 |
| FBP1 | rs10993297 | 9 | 97433716 | C | T | 0.0119054 | 0.106644 | 0.538621 | 3.32E-19 |
| FBP1 | rs7026123 | 9 | 97268153 | T | C | 0.0198454 | -0.132538 | 0.0995753 | 2.41E-11 |
| FBP1 | rs4520227 | 9 | 97412500 | C | A | 0.0371527 | 0.213275 | 0.0262947 | 9.45E-09 |
| FBP1 | rs12335609 | 9 | 97445112 | C | T | 0.0196539 | 0.180584 | 0.101452 | 4.00E-20 |
| FBP1 | rs117796243 | 9 | 97477106 | A | T | 0.0418805 | 0.323205 | 0.0205327 | 1.19E-14 |
| FBP1 | rs491123 | 9 | 97304402 | T | C | 0.0125244 | -0.13799 | 0.338451 | 3.14E-28 |
| FBP1 | rs112643057 | 9 | 97305176 | A | G | 0.0194546 | 0.293214 | 0.102647 | 2.49E-51 |
| FBP1 | rs28382863 | 9 | 97401064 | C | T | 0.0209203 | -0.220697 | 0.0880594 | 5.11E-26 |
| FBP1 | rs9657699 | 9 | 97397199 | T | C | 0.0228814 | -0.299336 | 0.0720379 | 4.16E-39 |
| FBP1 | rs4743962 | 9 | 97409311 | A | C | 0.011834 | 0.186231 | 0.537653 | 8.44E-56 |
| FBP1 | rs143997517 | 9 | 97412265 | A | C | 0.0524753 | 0.310617 | 0.0130013 | 3.24E-09 |
| FBP1 | rs117355087 | 9 | 97332674 | T | C | 0.0308965 | 0.264468 | 0.0383905 | 1.13E-17 |
