# Supplementary material for: Deciphering the Role of Metformin in Abdominal Aortic Aneurysm Progression: Insights from Two-Step Mendelian Randomization and Colocalization Analysis
Source: Research Square preprint supplement (doi:10.21203/rs.3.rs-6834737/v1), 2025-06-27
Supplement: Supplementary file 7 [file ddf6756f6d77d73baba61f5c.docx]

**Supplementary File 6. Table.** Selection of SNPs genetically associated with MG3 target.

| **Gene** | **SNP** | **chr** | **pos** | **Effect allele** | **Other allele** | **se** | **beta** | **eaf** | **pval** |
| --- | --- | --- | --- | --- | --- | --- | --- | --- | --- |
| GPD2 | rs111768862 | 2 | 157291485 | C | T | 0.0412059 | 0.321109 | 0.0212238 | 6.55E-15 |
| GPD2 | rs116496946 | 2 | 157300038 | C | T | 0.0455277 | 0.558834 | 0.0172054 | 1.24E-34 |
| GPD2 | rs148350919 | 2 | 157309889 | C | T | 0.0400025 | 0.227322 | 0.0225969 | 1.33E-08 |
| GPD2 | rs78467449 | 2 | 157369161 | T | G | 0.0232266 | 0.31044 | 0.0696998 | 9.61E-41 |
| GPD2 | rs114987220 | 2 | 157380316 | A | G | 0.0249637 | -0.203322 | 0.0602003 | 3.80E-16 |
| GPD2 | rs17266406 | 2 | 157424537 | C | T | 0.0249399 | -0.208667 | 0.0603066 | 5.91E-17 |
| GPD2 | rs4664829 | 2 | 157459315 | A | T | 0.013266 | -0.186283 | 0.273086 | 8.60E-45 |
| GPD2 | rs114380720 | 2 | 157475464 | A | G | 0.0389072 | -0.236813 | 0.0239112 | 1.15E-09 |
| GPD2 | rs62178504 | 2 | 157524461 | T | A | 0.0484162 | 0.457655 | 0.015249 | 3.31E-21 |
| GPD2 | rs298225 | 2 | 157222033 | C | T | 0.0135902 | 0.412378 | 0.23552 | 1.00E-200 |
| GPD2 | rs74534834 | 2 | 157255184 | C | T | 0.0220665 | -0.212346 | 0.0784247 | 6.39E-22 |
| GPD2 | rs4664816 | 2 | 157283544 | G | A | 0.0111599 | -0.53218 | 0.570984 | 1.00E-200 |
| GPD2 | rs78262703 | 2 | 157355941 | A | G | 0.0449834 | -0.295388 | 0.0177683 | 5.14E-11 |
| GPD2 | rs62176618 | 2 | 157420474 | A | C | 0.0206114 | 0.517457 | 0.0874686 | 4.37E-139 |
| GPD2 | rs72905888 | 2 | 157420852 | C | T | 0.0405035 | -0.361943 | 0.0219531 | 4.03E-19 |
| GPD2 | rs115123842 | 2 | 157463774 | T | C | 0.0438874 | 0.317082 | 0.0186721 | 5.02E-13 |
| GPD2 | rs7577045 | 2 | 157490646 | G | A | 0.0118694 | -0.205159 | 0.438571 | 6.12E-67 |
| GPD2 | rs1841759 | 2 | 157498317 | T | C | 0.0133243 | 0.329134 | 0.257634 | 1.02E-134 |
| GPD2 | rs79370730 | 2 | 157522674 | T | C | 0.0554985 | -0.317967 | 0.0116089 | 1.01E-08 |
| GPD2 | rs62179014 | 2 | 157263510 | T | G | 0.0331333 | -0.201149 | 0.0332914 | 1.27E-09 |
| GPD2 | rs114164201 | 2 | 157296955 | G | A | 0.0396465 | 0.346816 | 0.0229409 | 2.18E-18 |
| GPD2 | rs298259 | 2 | 157324825 | C | T | 0.0133075 | 0.270638 | 0.735935 | 6.00E-92 |
| GPD2 | rs74443354 | 2 | 157421362 | C | A | 0.0368253 | 0.316319 | 0.0266983 | 8.73E-18 |
| GPD2 | rs11691923 | 2 | 157246935 | G | A | 0.0118923 | -0.14766 | 0.452701 | 2.12E-35 |
| GPD2 | rs11694661 | 2 | 157303460 | T | C | 0.026934 | -0.252523 | 0.0511433 | 6.88E-21 |
| GPD2 | rs116612335 | 2 | 157325990 | C | T | 0.0421901 | 0.239952 | 0.0202659 | 1.29E-08 |
| GPD2 | rs71419096 | 2 | 157335736 | C | A | 0.0388195 | 0.265083 | 0.0240055 | 8.59E-12 |
| GPD2 | rs13412325 | 2 | 157338162 | G | T | 0.0425426 | 0.45684 | 0.0198059 | 6.72E-27 |
| GPD2 | rs297578 | 2 | 157355078 | A | G | 0.0126769 | 0.357904 | 0.703364 | 2.32E-175 |
| GPD2 | rs141651762 | 2 | 157366558 | C | G | 0.0229097 | 0.261535 | 0.0720678 | 3.49E-30 |
| GPD2 | rs2568816 | 2 | 157391576 | T | G | 0.0128114 | 0.426896 | 0.276582 | 1.00E-200 |
| GPD2 | rs62176645 | 2 | 157456950 | T | C | 0.0218626 | -0.238515 | 0.0798708 | 1.03E-27 |
| GPD2 | rs17267465 | 2 | 157460290 | G | A | 0.0380681 | 0.390099 | 0.0248824 | 1.22E-24 |
| GPD2 | rs115159284 | 2 | 157487986 | G | A | 0.0237682 | 0.250591 | 0.0666572 | 5.47E-26 |
| GPD2 | rs10179111 | 2 | 157489612 | G | A | 0.0441263 | 0.29611 | 0.0184761 | 1.94E-11 |
| GPD2 | rs116419596 | 2 | 157250248 | C | T | 0.0364737 | 0.475715 | 0.0270416 | 7.00E-39 |
| GPD2 | rs114694344 | 2 | 157322842 | A | G | 0.0451128 | -0.282041 | 0.0176698 | 4.05E-10 |
| GPD2 | rs75444299 | 2 | 157376719 | T | G | 0.0408093 | -0.252569 | 0.0216827 | 6.05E-10 |
| GPD2 | rs114700502 | 2 | 157389027 | G | A | 0.0297829 | -0.355132 | 0.0412373 | 8.87E-33 |
| GPD2 | rs115692065 | 2 | 157411651 | G | A | 0.0497309 | 0.494857 | 0.0144316 | 2.51E-23 |
| GPD2 | rs7561693 | 2 | 157456236 | G | A | 0.0128526 | -0.320499 | 0.288793 | 2.99E-137 |
| GPD2 | rs72909809 | 2 | 157473454 | C | T | 0.0229303 | 0.273932 | 0.0718599 | 6.80E-33 |
| GPD2 | rs141344625 | 2 | 157509975 | G | T | 0.0288465 | -0.197181 | 0.0444008 | 8.17E-12 |
| GPD2 | rs72913646 | 2 | 157512362 | C | T | 0.0418228 | 0.364599 | 0.0205663 | 2.84E-18 |
