# Supplementary material for: Deciphering the Role of Metformin in Abdominal Aortic Aneurysm Progression: Insights from Two-Step Mendelian Randomization and Colocalization Analysis
Source: Research Square preprint supplement (doi:10.21203/rs.3.rs-6834737/v1), 2025-06-27
Supplement: Supplementary file 8 [file de935f98c516c9e0e2a99f7b.docx]

**Supplementary 2. Table.** Five studied metformin targets and their associated genes.

| **Metformin** | **Gene Name** | **ENSG ID** |
| --- | --- | --- |
| AMPK | PRKAA1 | ENSG00000132356 |
| AMPK | PRKAB1 | ENSG00000111725 |
| AMPK | PRKAB2 | ENSG00000131791 |
| AMPK | PRKAG2 | ENSG00000106617 |
| AMPK | PRKAG3 | ENSG00000115592 |
| GDF15 | GDF15 | ENSG00000130513 |
| MG3 | GPD2 | ENSG00000115159 |
| FBP1 | FBP1 | ENSG00000165140 |
| MCI | NDUFA2 | ENSG00000131495 |
| MCI | NDUFA3 | ENSG00000170906 |
| MCI | NDUFA4 | ENSG00000189043 |
| MCI | NDUFA4L2 | ENSG00000185633 |
| MCI | NDUFA5 | ENSG00000128609 |
| MCI | NDUFA6 | ENSG00000184983 |
| MCI | NDUFA7 | ENSG00000267855 |
| MCI | NDUFA8 | ENSG00000119421 |
| MCI | NDUFA9 | ENSG00000139180 |
| MCI | NDUFA10 | ENSG00000130414 |
| MCI | NDUFA11 | ENSG00000174886 |
| MCI | NDUFA12 | ENSG00000184752 |
| MCI | NDUFA13 | ENSG00000186010 |
| MCI | NDUFAB1 | ENSG00000004779 |
| MCI | NDUFAF1 | ENSG00000137806 |
| MCI | NDUFAF2 | ENSG00000164182 |
| MCI | NDUFAF3 | ENSG00000178057 |
| MCI | NDUFAF4 | ENSG00000123545 |
| MCI | NDUFB1 | ENSG00000183648 |
| MCI | NDUFB2 | ENSG00000090266 |
| MCI | NDUFB5 | ENSG00000136521 |
| MCI | NDUFB6 | ENSG00000165264 |
| MCI | NDUFB7 | ENSG00000099795 |
| MCI | NDUFB8 | ENSG00000166136 |
| MCI | NDUFB9 | ENSG00000147684 |
| MCI | NDUFB10 | ENSG00000140990 |
| MCI | NDUFC1 | ENSG00000109390 |
| MCI | NDUFC2 | ENSG00000151366 |
| MCI | NDUFS1 | ENSG00000023228 |
| MCI | NDUFS2 | ENSG00000158864 |
| MCI | NDUFS4 | ENSG00000164258 |
| MCI | NDUFS5 | ENSG00000168653 |
| MCI | NDUFS6 | ENSG00000145494 |
| MCI | NDUFS8 | ENSG00000110717 |
| MCI | NDUFV2 | ENSG00000178127 |
| MCI | NDUFV3 | ENSG00000160194 |
