# Supplementary material for: Deciphering the Role of Metformin in Abdominal Aortic Aneurysm Progression: Insights from Two-Step Mendelian Randomization and Colocalization Analysis
Source: Research Square preprint supplement (doi:10.21203/rs.3.rs-6834737/v1), 2025-06-27
Supplement: Supplementary file 9 [file f53b32889aeef06dff12a41f.docx]

**Supplementary File 8. Table A**. Results of MR analysis of the causal relationship between metformin treatment and AAA.

| **exposure** | **outcome** | **method** | **nsnp** | **b** | **se** | **pval** | **lo_ci** | **up_ci** | **or** | **or_lci95** | **or_uci95** |
| --- | --- | --- | --- | --- | --- | --- | --- | --- | --- | --- | --- |
| Treatment/medication code: metformin | AAA | MR Egger | 43 | -7.48759821 | 5.48786608 | 0.17988696 | -18.2438157 | 3.268619304 | 0.00055999 | 1.19E-08 | 26.2750365 |
| Treatment/medication code: metformin | AAA | Weighted median | 43 | -3.90096768 | 2.41590316 | 0.10637488 | -8.63613788 | 0.83420252 | 0.02022233 | 0.00017757 | 2.30297674 |
| Treatment/medication code: metformin | AAA | Inverse variance weighted | 43 | -4.52750062 | 2.02564054 | 0.02541106 | -8.49775607 | -0.55724517 | 0.01080765 | 0.00020393 | 0.57278482 |
| Treatment/medication code: metformin | AAA | Simple mode | 43 | -0.61707925 | 4.85108152 | 0.89938564 | -10.125199 | 8.891040527 | 0.53951793 | 4.01E-05 | 7266.57632 |
| Treatment/medication code: metformin | AAA | Weighted mode | 43 | -6.02735007 | 2.9183715 | 0.04510087 | -11.7473582 | -0.30734193 | 0.00241188 | 7.91E-06 | 0.7353991 |

**Supplementary File 8. Table B**. Heterogeneity Analysis of causal effects between metformin treatment and AAA.

| **exposure** | **outcome** | **method** | **Q** | **Q_df** | **Q_pval** |
| --- | --- | --- | --- | --- | --- |
| Treatment/medication code: metformin | Abdominal aortic aneurysm | MR Egger | 73.02172915 | 41 | 0.00153483 |
| Treatment/medication code: metformin | Abdominal aortic aneurysm | Weighted median | 73.62315382 | 42 | 0.00182953 |

**Supplementary File 8. Table C**. Pleiotropy analysis of causal effects between metformin treatment and AAA.

| **exposure** | **outcome** | **egger_intercept** | **se** | **pval** |
| --- | --- | --- | --- | --- |
| Treatment/medication code: metformin | Abdominal aortic aneurysm | 0.009212987 | 0.015854186 | 0.564349069 |

**Supplementary File 8. Table D**. Sensitivity test for every single SNPs.

| **exposure** | **outcome** | **SNP** | **b** | **se** | **pval** |
| --- | --- | --- | --- | --- | --- |
| Treatment/medication code: metformin | Abdominal aortic aneurysm | rs10001190 | 8.212300459 | 9.655746407 | 0.39504209 |
| Treatment/medication code: metformin | Abdominal aortic aneurysm | rs10195252 | 0.35398701 | 13.25654068 | 0.97869676 |
| Treatment/medication code: metformin | Abdominal aortic aneurysm | rs10420309 | -21.91857396 | 13.1071323 | 0.09447245 |
| Treatment/medication code: metformin | Abdominal aortic aneurysm | rs10965246 | -14.00647913 | 7.953515847 | 0.07823122 |
| Treatment/medication code: metformin | Abdominal aortic aneurysm | rs11257655 | -18.41911671 | 10.20910497 | 0.07120227 |
| Treatment/medication code: metformin | Abdominal aortic aneurysm | rs11658063 | -0.777887739 | 10.16457657 | 0.93899802 |
| Treatment/medication code: metformin | Abdominal aortic aneurysm | rs11708067 | 4.567242685 | 14.96097791 | 0.76015518 |
| Treatment/medication code: metformin | Abdominal aortic aneurysm | rs1215468 | -14.59429652 | 9.089949944 | 0.10837458 |
| Treatment/medication code: metformin | Abdominal aortic aneurysm | rs12555274 | -3.458330782 | 9.898191146 | 0.7267964 |
| Treatment/medication code: metformin | Abdominal aortic aneurysm | rs13266634 | 0.40511546 | 9.912343485 | 0.9673997 |
| Treatment/medication code: metformin | Abdominal aortic aneurysm | rs1421085 | 0.500919519 | 7.029526788 | 0.94319135 |
| Treatment/medication code: metformin | Abdominal aortic aneurysm | rs1496653 | -16.81371945 | 9.139640195 | 0.06581995 |
| Treatment/medication code: metformin | Abdominal aortic aneurysm | rs1613295 | 18.48853817 | 10.50515314 | 0.07841638 |
| Treatment/medication code: metformin | Abdominal aortic aneurysm | rs17036160 | -0.630661365 | 10.31539445 | 0.9512494 |
| Treatment/medication code: metformin | Abdominal aortic aneurysm | rs17250977 | -33.61826343 | 18.68084123 | 0.07192195 |
| Treatment/medication code: metformin | Abdominal aortic aneurysm | rs17513135 | 8.467994373 | 13.1671063 | 0.52014796 |
| Treatment/medication code: metformin | Abdominal aortic aneurysm | rs1800961 | 30.61875593 | 10.33344577 | 0.00304584 |
| Treatment/medication code: metformin | Abdominal aortic aneurysm | rs2009222 | -20.03929584 | 13.96039865 | 0.15116214 |
| Treatment/medication code: metformin | Abdominal aortic aneurysm | rs2796441 | 9.807185478 | 13.59799898 | 0.47077251 |
| Treatment/medication code: metformin | Abdominal aortic aneurysm | rs34744311 | -3.768293025 | 8.774086402 | 0.66757408 |
| Treatment/medication code: metformin | Abdominal aortic aneurysm | rs34872471 | -8.801763298 | 3.567746832 | 0.01362363 |
| Treatment/medication code: metformin | Abdominal aortic aneurysm | rs459193 | 26.96365044 | 11.09450548 | 0.0150838 |
| Treatment/medication code: metformin | Abdominal aortic aneurysm | rs4752792 | -18.71620071 | 12.1027747 | 0.12199862 |
| Treatment/medication code: metformin | Abdominal aortic aneurysm | rs4932264 | 7.165591883 | 12.97934611 | 0.58089595 |
| Treatment/medication code: metformin | Abdominal aortic aneurysm | rs62106258 | -45.76767163 | 20.75657573 | 0.02745605 |
| Treatment/medication code: metformin | Abdominal aortic aneurysm | rs67232546 | -0.943523421 | 15.19454363 | 0.95048622 |
| Treatment/medication code: metformin | Abdominal aortic aneurysm | rs6768776 | -15.99395141 | 12.34799207 | 0.19522801 |
| Treatment/medication code: metformin | Abdominal aortic aneurysm | rs6769511 | -0.208030167 | 8.345761647 | 0.98011363 |
| Treatment/medication code: metformin | Abdominal aortic aneurysm | rs7177055 | -1.101360813 | 11.82498366 | 0.92579356 |
| Treatment/medication code: metformin | Abdominal aortic aneurysm | rs72802357 | -1.691036156 | 11.20770822 | 0.88006917 |
| Treatment/medication code: metformin | Abdominal aortic aneurysm | rs72824077 | -42.89099394 | 14.21136541 | 0.00254384 |
| Treatment/medication code: metformin | Abdominal aortic aneurysm | rs73188924 | -1.279796298 | 14.51834609 | 0.92975723 |
| Treatment/medication code: metformin | Abdominal aortic aneurysm | rs74567345 | -16.22423285 | 9.207842023 | 0.07806902 |
| Treatment/medication code: metformin | Abdominal aortic aneurysm | rs7482891 | 5.522011768 | 11.87535943 | 0.64193329 |
| Treatment/medication code: metformin | Abdominal aortic aneurysm | rs76550717 | 14.64666896 | 10.26682734 | 0.15369486 |
| Treatment/medication code: metformin | Abdominal aortic aneurysm | rs76675804 | 10.0950922 | 13.53819939 | 0.45586397 |
| Treatment/medication code: metformin | Abdominal aortic aneurysm | rs7756992 | -11.7241293 | 8.138385709 | 0.14969873 |
| Treatment/medication code: metformin | Abdominal aortic aneurysm | rs780093 | -3.910709612 | 12.40275664 | 0.75252651 |
| Treatment/medication code: metformin | Abdominal aortic aneurysm | rs849142 | -11.28208981 | 10.22366351 | 0.26979833 |
| Treatment/medication code: metformin | Abdominal aortic aneurysm | rs8756 | -28.99585625 | 13.02509565 | 0.02600393 |
| Treatment/medication code: metformin | Abdominal aortic aneurysm | rs947791 | 31.68411993 | 18.48163148 | 0.08646312 |
| Treatment/medication code: metformin | Abdominal aortic aneurysm | rs987237 | -8.101602295 | 12.29464418 | 0.50992545 |
| Treatment/medication code: metformin | Abdominal aortic aneurysm | rs9957264 | 0.15588017 | 10.85731143 | 0.98854504 |
| Treatment/medication code: metformin | Abdominal aortic aneurysm | All - Inverse variance weighted | -4.52750062 | 2.025640536 | 0.02541106 |
| Treatment/medication code: metformin | Abdominal aortic aneurysm | All - MR Egger | -7.48759821 | 5.487866078 | 0.17988696 |

**Supplementary File 10. Table E**. Leave-one-out sensitivity test for all instrumental variable SNPs.

| **exposure** | **outcome** | **SNP** | **b** | **se** | **pval** |
| --- | --- | --- | --- | --- | --- |
| Treatment/medication code: metformin | Abdominal aortic aneurysm | rs10001190 | -4.855590962 | 2.051091041 | 0.01791738 |
| Treatment/medication code: metformin | Abdominal aortic aneurysm | rs10195252 | -4.593399041 | 2.062059498 | 0.02590865 |
| Treatment/medication code: metformin | Abdominal aortic aneurysm | rs10420309 | -4.287269811 | 2.039130522 | 0.03550959 |
| Treatment/medication code: metformin | Abdominal aortic aneurysm | rs10965246 | -4.163268615 | 2.068179546 | 0.04411345 |
| Treatment/medication code: metformin | Abdominal aortic aneurysm | rs11257655 | -4.208345406 | 2.046764994 | 0.03977326 |
| Treatment/medication code: metformin | Abdominal aortic aneurysm | rs11658063 | -4.614420672 | 2.071859458 | 0.02593471 |
| Treatment/medication code: metformin | Abdominal aortic aneurysm | rs11708067 | -4.623616641 | 2.055765982 | 0.02450634 |
| Treatment/medication code: metformin | Abdominal aortic aneurysm | rs1215468 | -4.234000131 | 2.061960682 | 0.04003521 |
| Treatment/medication code: metformin | Abdominal aortic aneurysm | rs12555274 | -4.553670195 | 2.074965338 | 0.02819399 |
| Treatment/medication code: metformin | Abdominal aortic aneurysm | rs13266634 | -4.647881065 | 2.071483384 | 0.02484879 |
| Treatment/medication code: metformin | Abdominal aortic aneurysm | rs1421085 | -4.777543766 | 2.092873609 | 0.02244407 |
| Treatment/medication code: metformin | Abdominal aortic aneurysm | rs1496653 | -4.173288586 | 2.053113394 | 0.04208653 |
| Treatment/medication code: metformin | Abdominal aortic aneurysm | rs1613295 | -5.026265908 | 2.002080726 | 0.01205531 |
| Treatment/medication code: metformin | Abdominal aortic aneurysm | rs17036160 | -4.615152413 | 2.07106853 | 0.02585439 |
| Treatment/medication code: metformin | Abdominal aortic aneurysm | rs17250977 | -4.331053906 | 2.02271013 | 0.03225684 |
| Treatment/medication code: metformin | Abdominal aortic aneurysm | rs17513135 | -4.705359397 | 2.050287534 | 0.02173454 |
| Treatment/medication code: metformin | Abdominal aortic aneurysm | rs1800961 | -5.315225645 | 1.899240129 | 0.00513237 |
| Treatment/medication code: metformin | Abdominal aortic aneurysm | rs2009222 | -4.338930116 | 2.045039238 | 0.03386416 |
| Treatment/medication code: metformin | Abdominal aortic aneurysm | rs2796441 | -4.711294382 | 2.047463818 | 0.02138942 |
| Treatment/medication code: metformin | Abdominal aortic aneurysm | rs34744311 | -4.551308807 | 2.081983605 | 0.02881235 |
| Treatment/medication code: metformin | Abdominal aortic aneurysm | rs34872471 | -3.564365731 | 2.242188683 | 0.11190663 |
| Treatment/medication code: metformin | Abdominal aortic aneurysm | rs459193 | -5.137979749 | 1.951101579 | 0.00845413 |
| Treatment/medication code: metformin | Abdominal aortic aneurysm | rs4752792 | -4.297076133 | 2.047076601 | 0.0358056 |
| Treatment/medication code: metformin | Abdominal aortic aneurysm | rs4932264 | -4.692263799 | 2.053015618 | 0.02228077 |
| Treatment/medication code: metformin | Abdominal aortic aneurysm | rs62106258 | -4.302214376 | 1.99960396 | 0.03143414 |
| Treatment/medication code: metformin | Abdominal aortic aneurysm | rs67232546 | -4.564209845 | 2.059880826 | 0.02670767 |
| Treatment/medication code: metformin | Abdominal aortic aneurysm | rs6768776 | -4.348722244 | 2.053790428 | 0.03422482 |
| Treatment/medication code: metformin | Abdominal aortic aneurysm | rs6769511 | -4.677712519 | 2.081608622 | 0.02462965 |
| Treatment/medication code: metformin | Abdominal aortic aneurysm | rs7177055 | -4.585831065 | 2.066374224 | 0.02646873 |
| Treatment/medication code: metformin | Abdominal aortic aneurysm | rs72802357 | -4.581361409 | 2.068650851 | 0.02678331 |
| Treatment/medication code: metformin | Abdominal aortic aneurysm | rs72824077 | -4.077649207 | 1.956202095 | 0.03711722 |
| Treatment/medication code: metformin | Abdominal aortic aneurysm | rs73188924 | -4.563971959 | 2.060965607 | 0.02679562 |
| Treatment/medication code: metformin | Abdominal aortic aneurysm | rs74567345 | -4.195401796 | 2.05553079 | 0.04124776 |
| Treatment/medication code: metformin | Abdominal aortic aneurysm | rs7482891 | -4.69712184 | 2.057174297 | 0.0224134 |
| Treatment/medication code: metformin | Abdominal aortic aneurysm | rs76550717 | -4.962969066 | 2.022494137 | 0.0141322 |
| Treatment/medication code: metformin | Abdominal aortic aneurysm | rs76675804 | -4.716667224 | 2.046786676 | 0.02119878 |
| Treatment/medication code: metformin | Abdominal aortic aneurysm | rs7756992 | -4.263844094 | 2.075889247 | 0.0399772 |
| Treatment/medication code: metformin | Abdominal aortic aneurysm | rs780093 | -4.537031227 | 2.065938421 | 0.02808396 |
| Treatment/medication code: metformin | Abdominal aortic aneurysm | rs849142 | -4.372767971 | 2.067247152 | 0.03440768 |
| Treatment/medication code: metformin | Abdominal aortic aneurysm | rs8756 | -4.185177337 | 2.013690923 | 0.03767609 |
| Treatment/medication code: metformin | Abdominal aortic aneurysm | rs947791 | -4.777370226 | 2.00252135 | 0.01704769 |
| Treatment/medication code: metformin | Abdominal aortic aneurysm | rs987237 | -4.47128299 | 2.065050778 | 0.03037107 |
| Treatment/medication code: metformin | Abdominal aortic aneurysm | rs9957264 | -4.622382896 | 2.068186731 | 0.02541781 |
| Treatment/medication code: metformin | Abdominal aortic aneurysm | All | -4.52750062 | 2.025640536 | 0.02541106 |
